# Supplementary material for: Semi-Synthesis and In Vitro Anti-Cancer Evaluation of Magnolol Derivatives
Source: MDPI journal article supplement (doi:10.3390/molecules26144302), 2021-07-15
Supplement: s1 [file s1]

Supplementary materials for

# Semi-Synthesis and In Vitro Anti-Cancer Evaluation of Magnolol Derivatives

Xiao-Long Sun <sup>1</sup>, Mei-Lin Zhu <sup>1</sup>, Yi-Qun Dai <sup>1</sup>, Hong-Mei Li <sup>1</sup>, Bo-Han Li <sup>1</sup>, Hui Ma <sup>1</sup>,  
Chang-Hao Zhang <sup>2,\*</sup> and Cheng-Zhu Wu <sup>1,\*</sup>

<sup>1</sup> School of Pharmacy, Bengbu Medical College, 2600 Donghai Road, Bengbu 233030, China;

sunxiaolong96@foxmail.com (X.-L.S.); zlyk521@126.com (M.-L.Z.);

daiyiqun25@126.com (Y.-Q.D.);

athongmei@bbmc.edu.cn (H.-M.L.); libohan1228@foxmail.com (B.-H.L.);

mahui9513@foxmail.com (H.M.)

<sup>2</sup> Key Laboratory of Natural Medicines of the Changbai Mountain, Ministry of Education, College of

Pharmacy, Yanbian University, 977 Gongyuan Road, Yanji 133002, China

\* Correspondence: zhangch@ybu.edu.cn (C.-H.Z.);

wuchengzhu0611@bbmc.edu.cn (C.-Z.W.);

Tel.: +86-443-243-6006(C.-H.Z.); +86-552-317-5232(C.-Z.W.)

|                                                          |    |
|----------------------------------------------------------|----|
| Figure S1 $^1\text{H}$ NMR spectrum of compound 1a.....  | 3  |
| Figure S2 $^{13}\text{C}$ NMR spectrum of 1a.....        | 3  |
| Figure S3 $^1\text{H}$ NMR spectrum of compound 1b.....  | 4  |
| Figure S4 $^{13}\text{C}$ NMR spectrum of 1b.....        | 4  |
| Figure S5 $^1\text{H}$ NMR spectrum of compound 2a.....  | 5  |
| Figure S6 $^{13}\text{C}$ NMR spectrum of 2a.....        | 5  |
| Figure S7 $^1\text{H}$ NMR spectrum of compound 2b.....  | 6  |
| Figure S8 $^{13}\text{C}$ NMR spectrum of 2b.....        | 6  |
| Figure S9 $^1\text{H}$ NMR spectrum of compound 3a.....  | 7  |
| Figure S10 $^{13}\text{C}$ NMR spectrum of 3a.....       | 7  |
| Figure S11 $^1\text{H}$ NMR spectrum of compound 3b..... | 8  |
| Figure S12 $^{13}\text{C}$ NMR spectrum of 3b.....       | 8  |
| Figure S13 $^1\text{H}$ NMR spectrum of compound 4a..... | 9  |
| Figure S14 $^{13}\text{C}$ NMR spectrum of 4a.....       | 9  |
| Figure S15 $^1\text{H}$ NMR spectrum of compound 4b..... | 10 |
| Figure S16 $^{13}\text{C}$ NMR spectrum of 4b.....       | 10 |
| Figure S17 $^1\text{H}$ NMR spectrum of compound 5a..... | 11 |
| Figure S18 $^{13}\text{C}$ NMR spectrum of 5a.....       | 11 |
| Figure S19 $^1\text{H}$ NMR spectrum of compound 5b..... | 12 |
| Figure S20 $^{13}\text{C}$ NMR spectrum of 5b.....       | 12 |
| Figure S21 $^1\text{H}$ NMR spectrum of compound 6a..... | 13 |
| Figure S22 $^{13}\text{C}$ NMR spectrum of 6a.....       | 13 |
| Figure S23 $^1\text{H}$ NMR spectrum of compound 6b..... | 14 |
| Figure S24 $^{13}\text{C}$ NMR spectrum of 6b.....       | 14 |
| Figure S25 $^1\text{H}$ NMR spectrum of compound 7a..... | 15 |
| Figure S26 $^{13}\text{C}$ NMR spectrum of 7a.....       | 15 |
| Figure S27 $^1\text{H}$ NMR spectrum of compound 8a..... | 16 |
| Figure S28 $^{13}\text{C}$ NMR spectrum of 8a.....       | 16 |
| Figure S29 $^1\text{H}$ NMR spectrum of compound 9a..... | 17 |
| Figure S30 $^{13}\text{C}$ NMR spectrum of 9a.....       | 17 |
| Figure S31 HR-ESI-MS spectrum of compound 3a.....        | 18 |
| Figure S32 HR-ESI-MS spectrum of compound 3b.....        | 18 |
| Figure S33 HR-ESI-MS spectrum of compound 4a.....        | 19 |
| Figure S34 HR-ESI-MS spectrum of compound 4b.....        | 19 |
| Figure S35 HR-ESI-MS spectrum of compound 5a.....        | 20 |
| Figure S36 HR-ESI-MS spectrum of compound 5b.....        | 20 |
| Figure S37 HR-ESI-MS spectrum of compound 6a.....        | 21 |
| Figure S38 HR-ESI-MS spectrum of compound 6b.....        | 21 |
| Figure S39 HR-ESI-MS spectrum of compound 7a.....        | 22 |
| Figure S40 HR-ESI-MS spectrum of compound 8a.....        | 22 |
| Figure S41 HR-ESI-MS spectrum of compound 9a.....        | 23 |

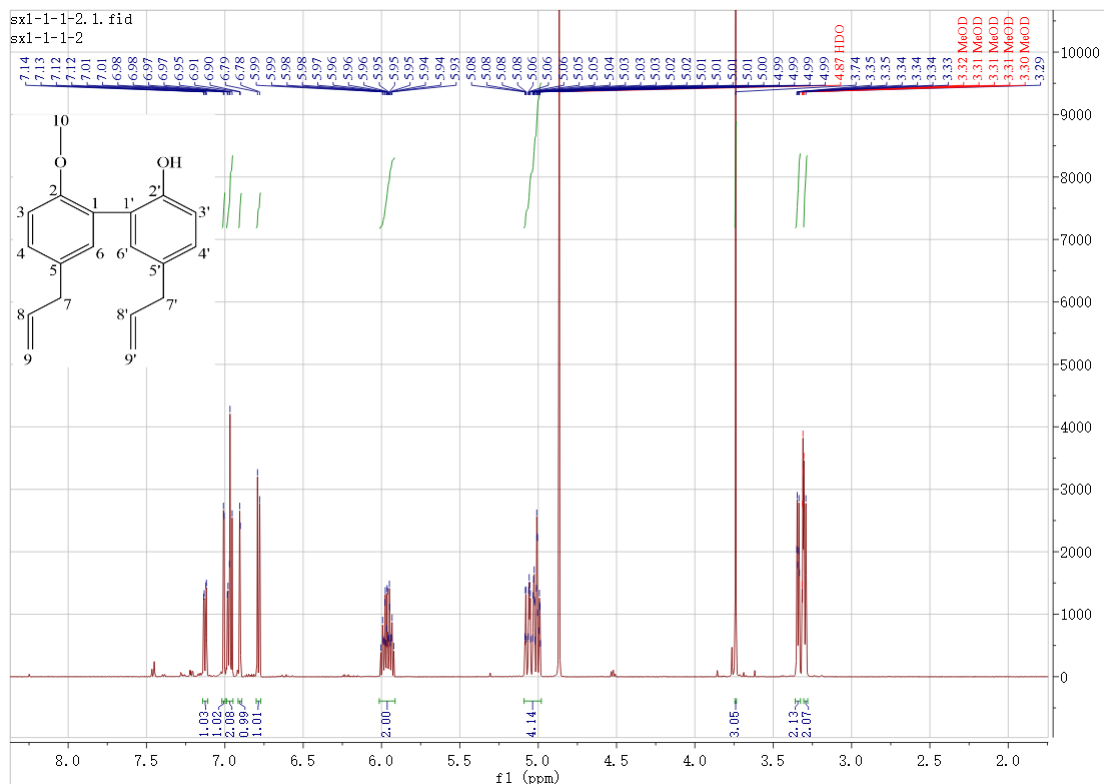

**Figure S1  $^1\text{H}$  NMR spectrum of compound 1a**

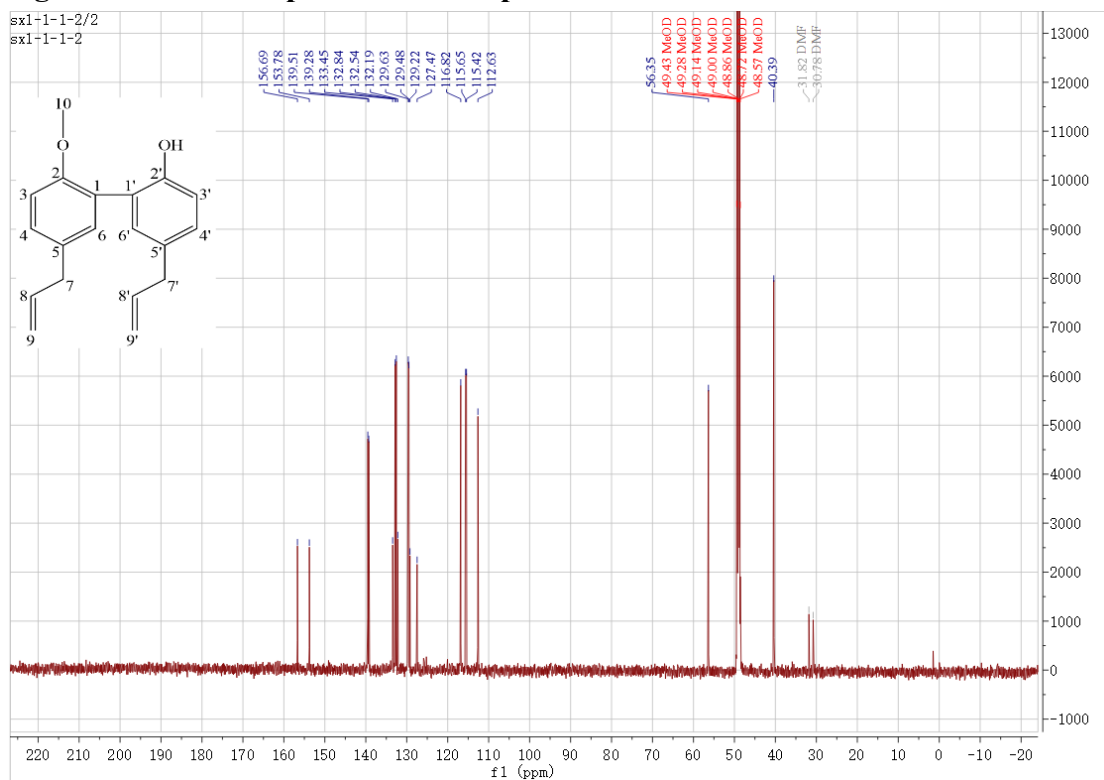

**Figure S2  $^{13}\text{C}$  NMR spectrum of 1a**

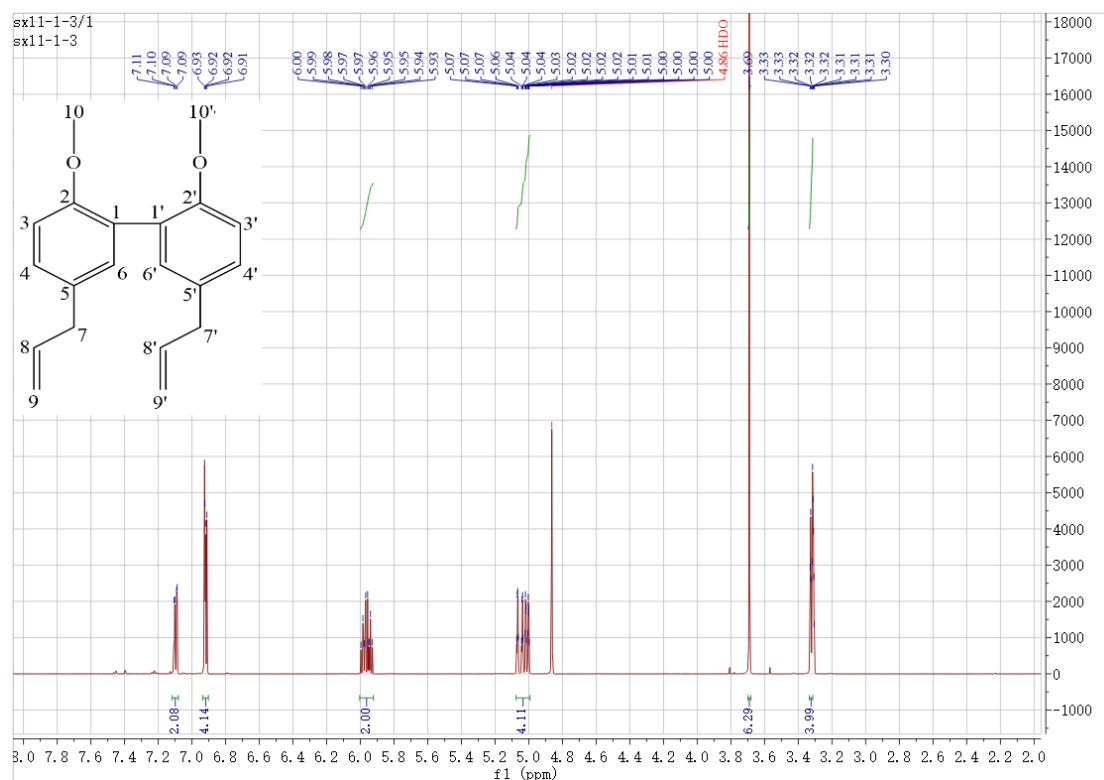

**Figure S3  $^1\text{H}$  NMR spectrum of compound 1b**

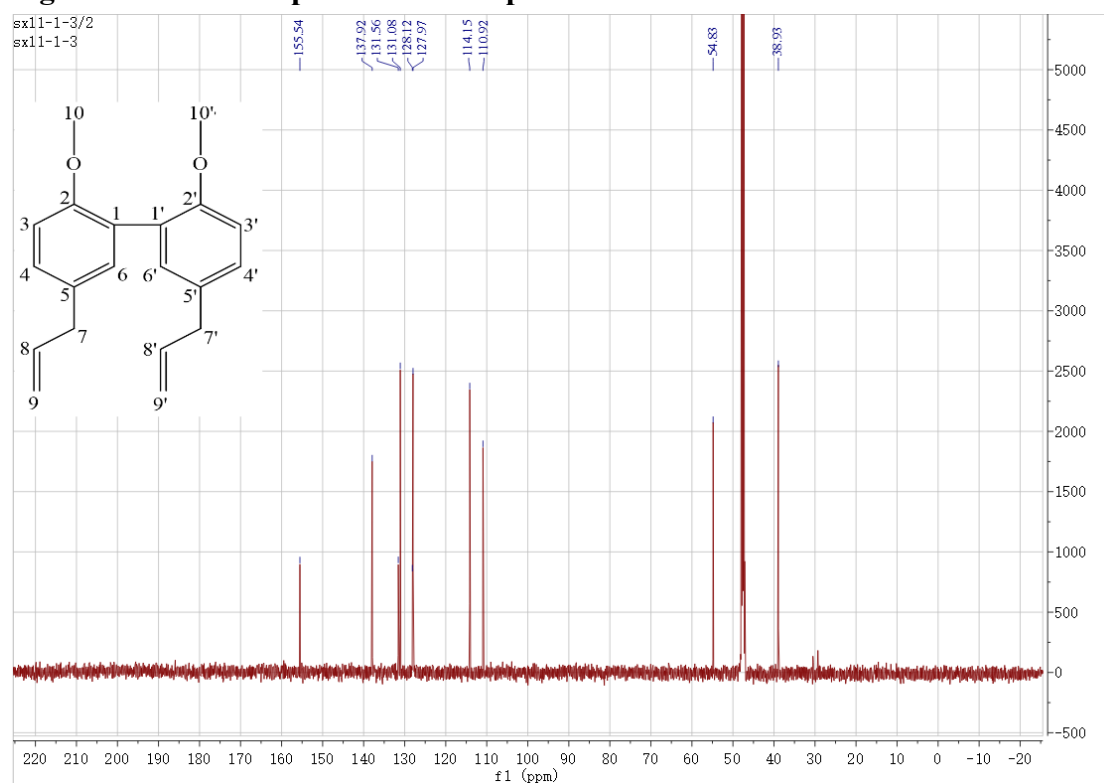

**Figure S4  $^{13}\text{C}$  NMR spectrum of 1b**

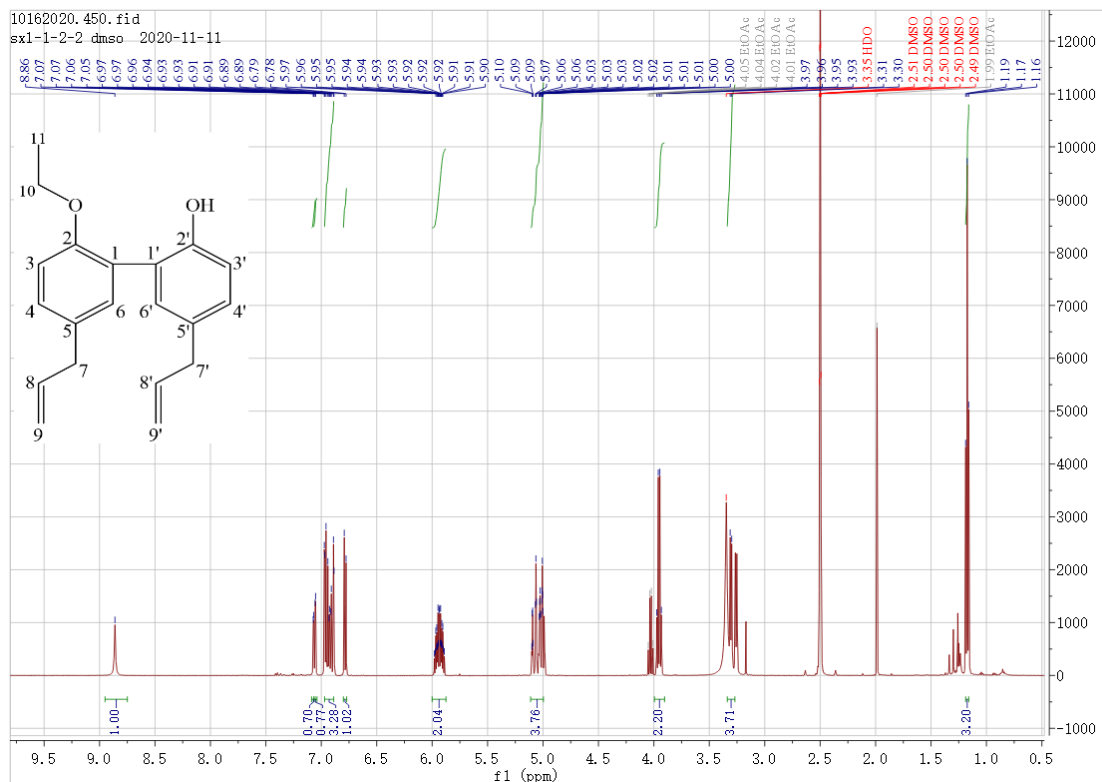

**Figure S5  $^1\text{H}$  NMR spectrum of compound 2a**

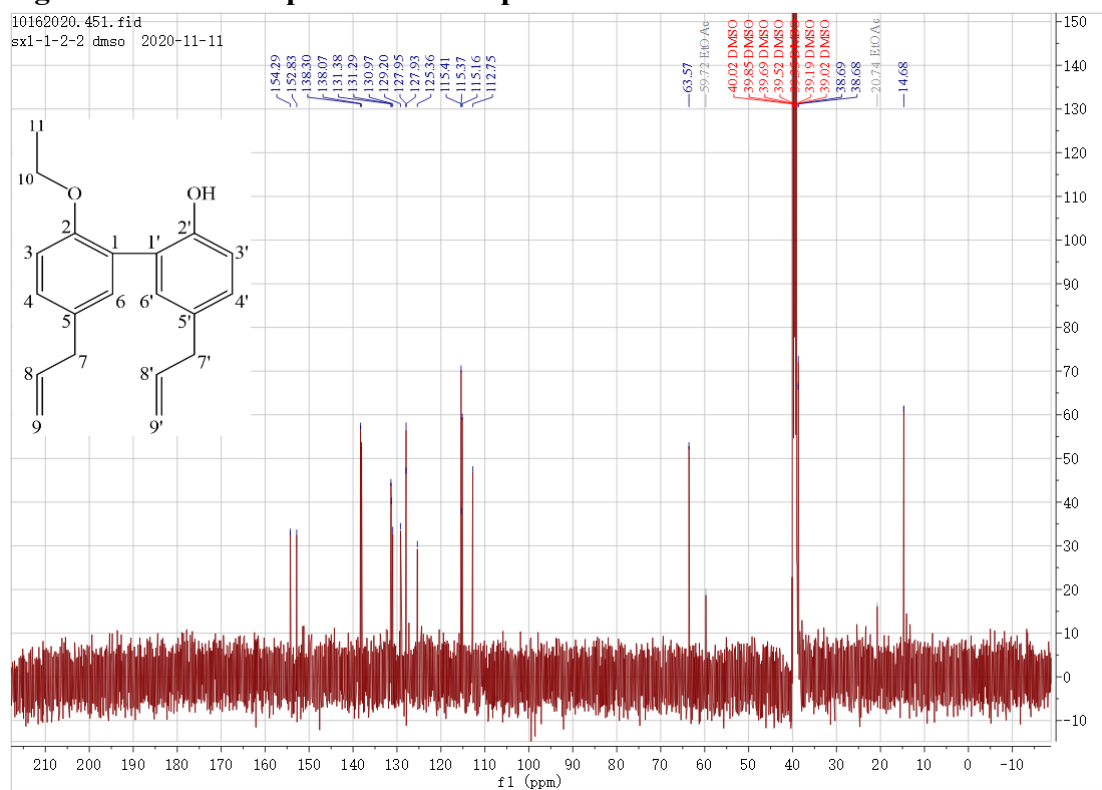

**Figure S6  $^{13}\text{C}$  NMR spectrum of 2a**

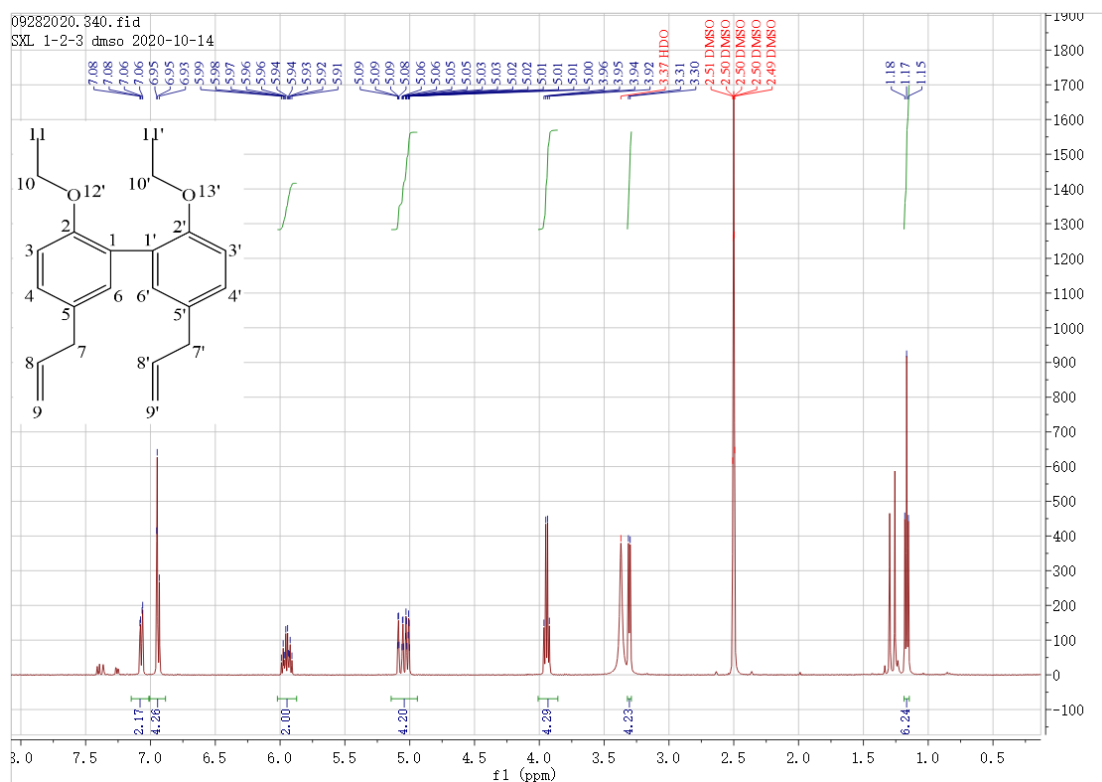

**Figure S7  $^1\text{H}$  NMR spectrum of compound 2b**

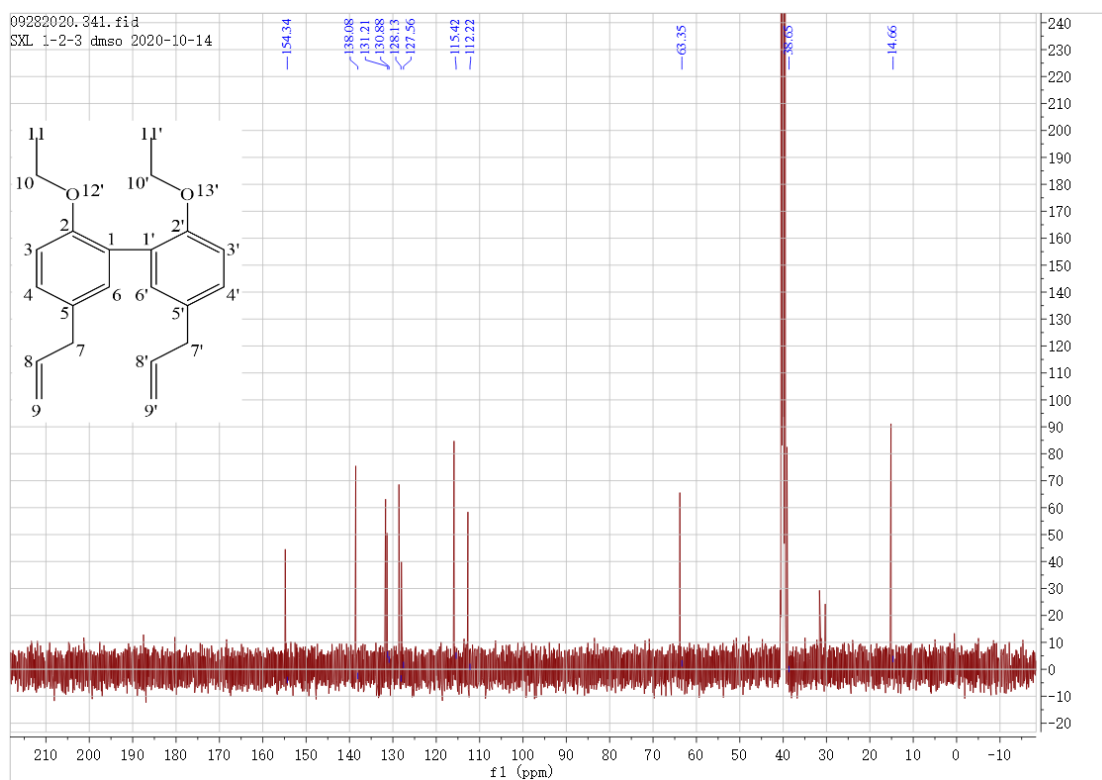

**Figure S8  $^{13}\text{C}$  NMR spectrum of 2b**

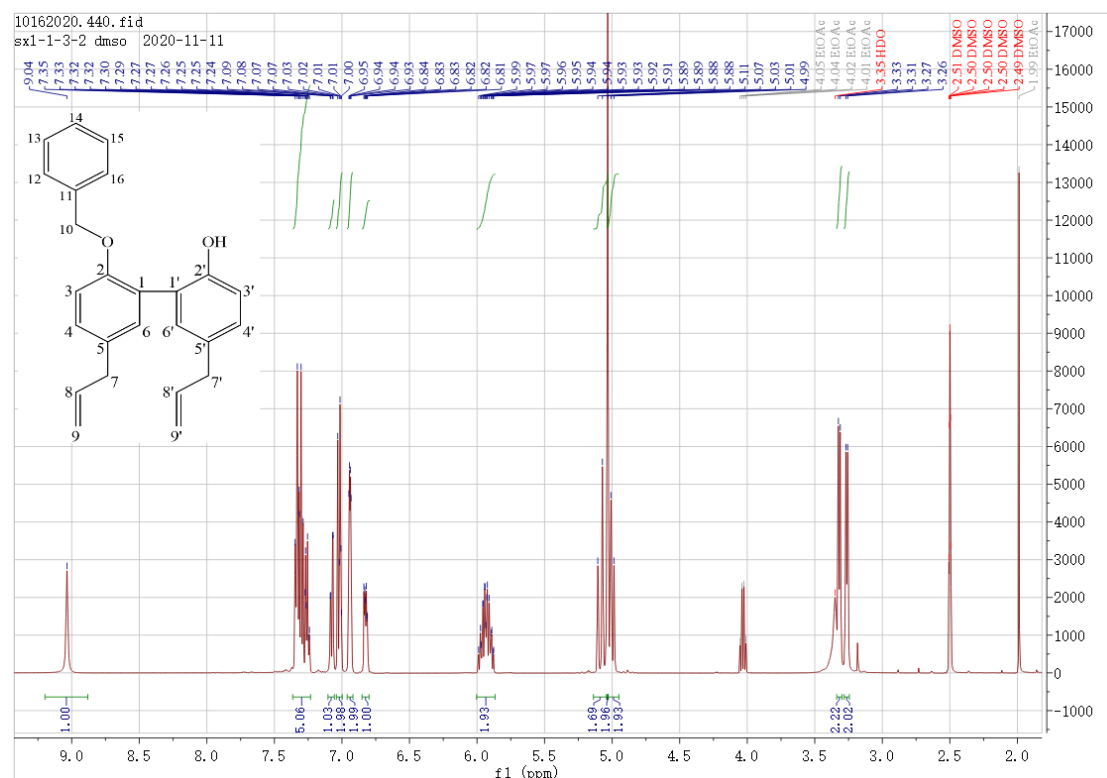

**Figure S9 <sup>1</sup>H NMR spectrum of compound 3a**

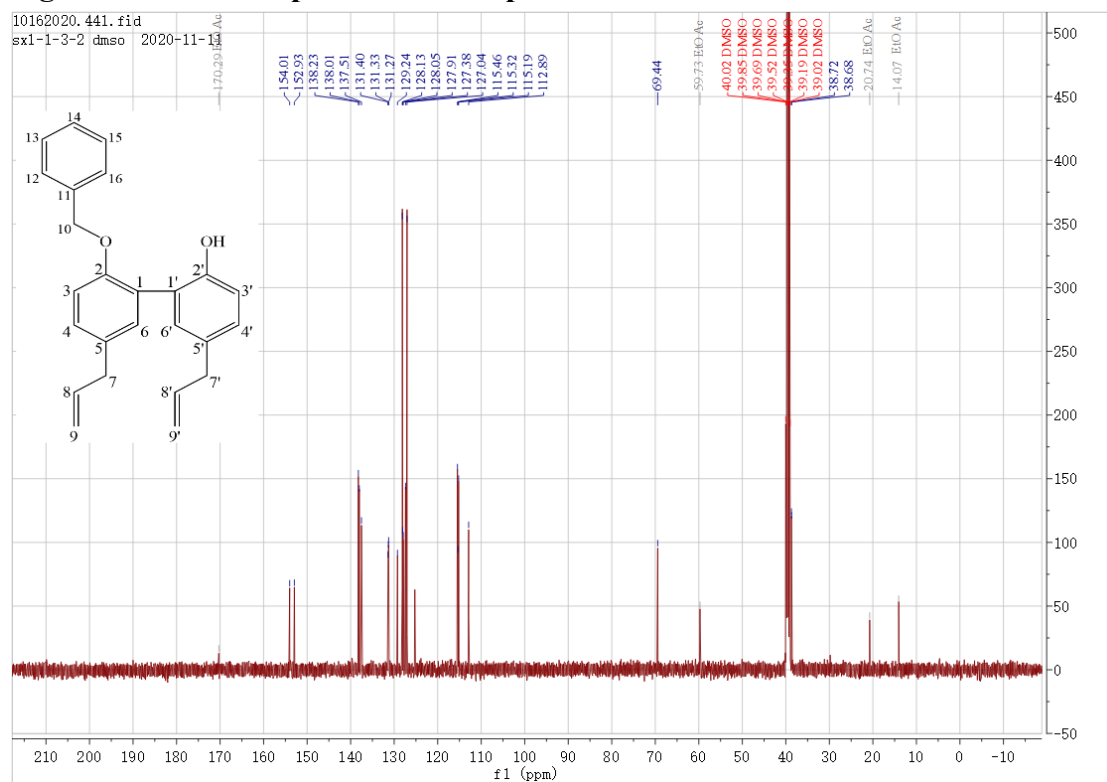

**Figure S10 <sup>13</sup>C NMR spectrum of 3a**

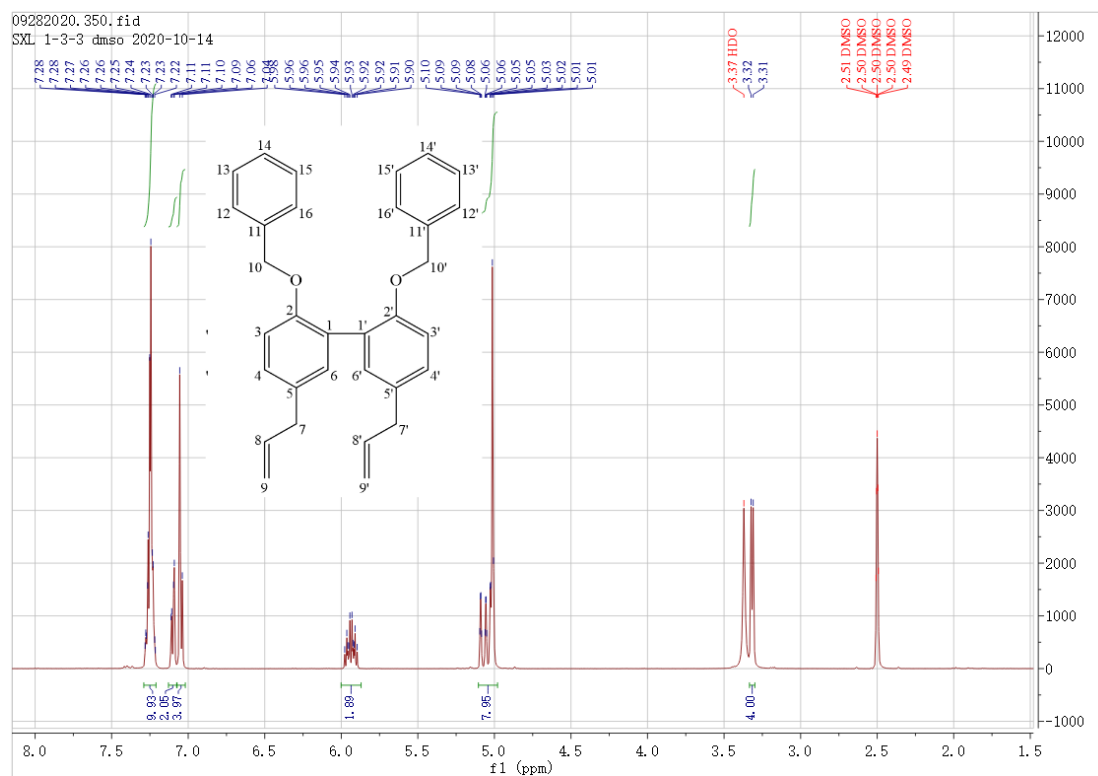

**Figure S11  $^1\text{H}$  NMR spectrum of compound 3b**

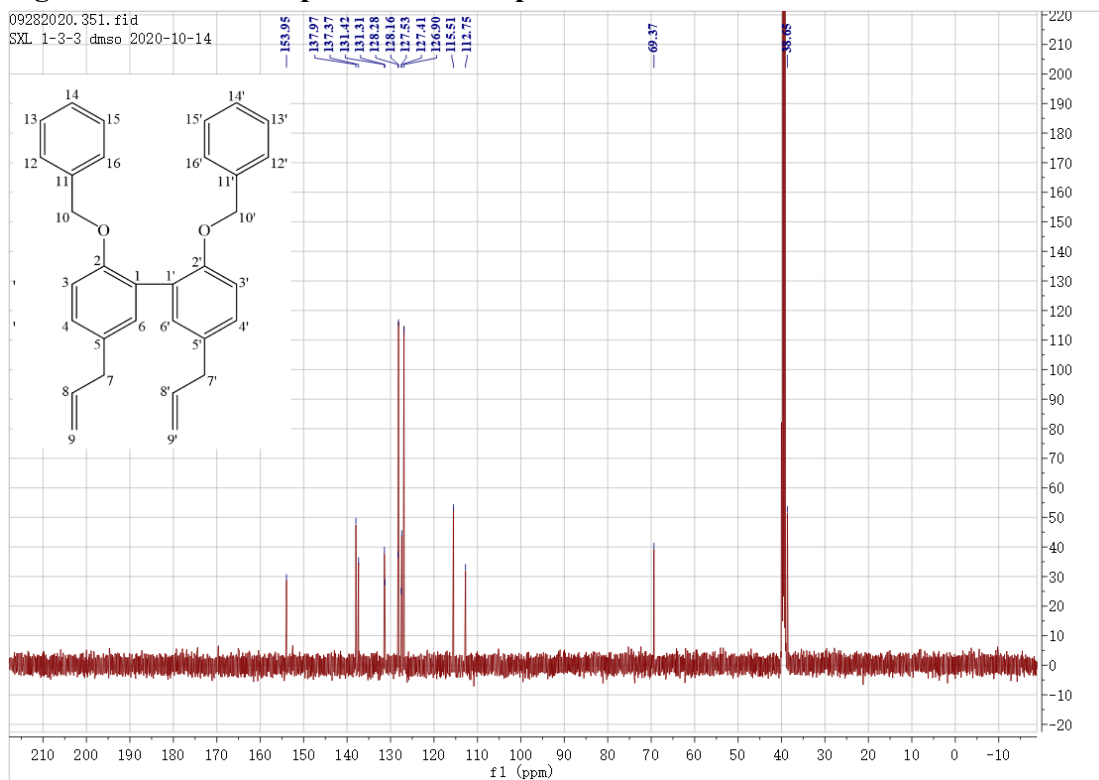

**Figure S12  $^{13}\text{C}$  NMR spectrum of 3b**



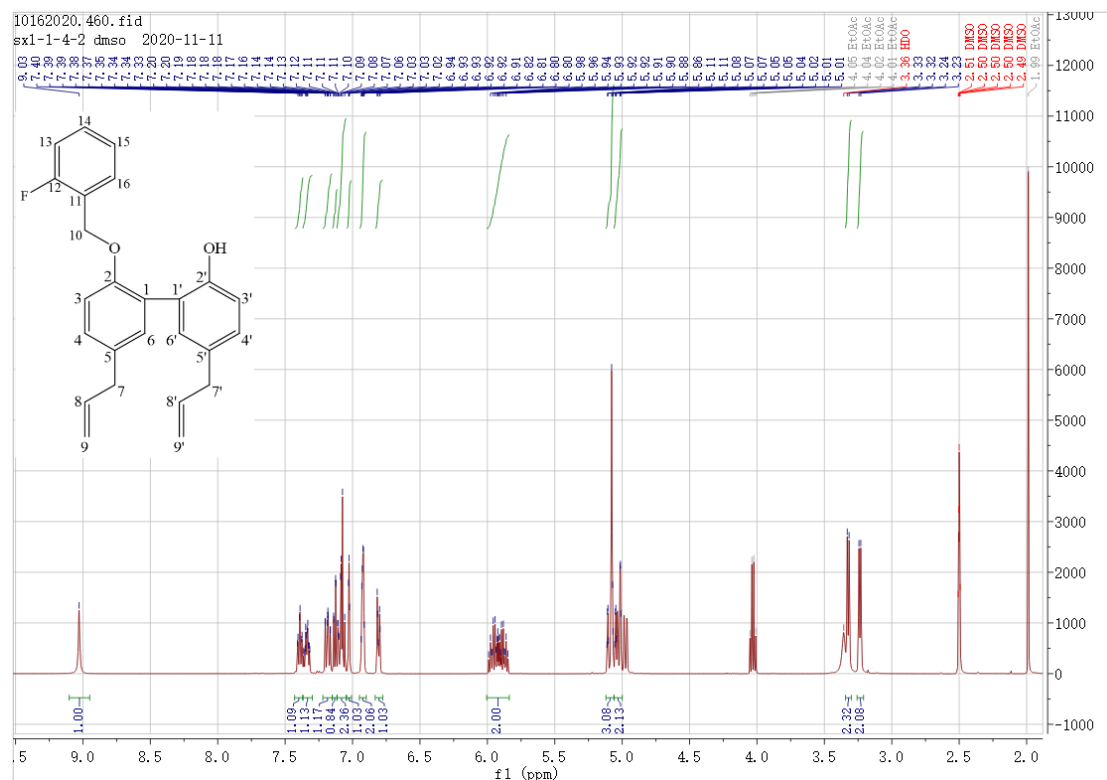

**Figure S13 <sup>1</sup>H NMR spectrum of compound 4a**

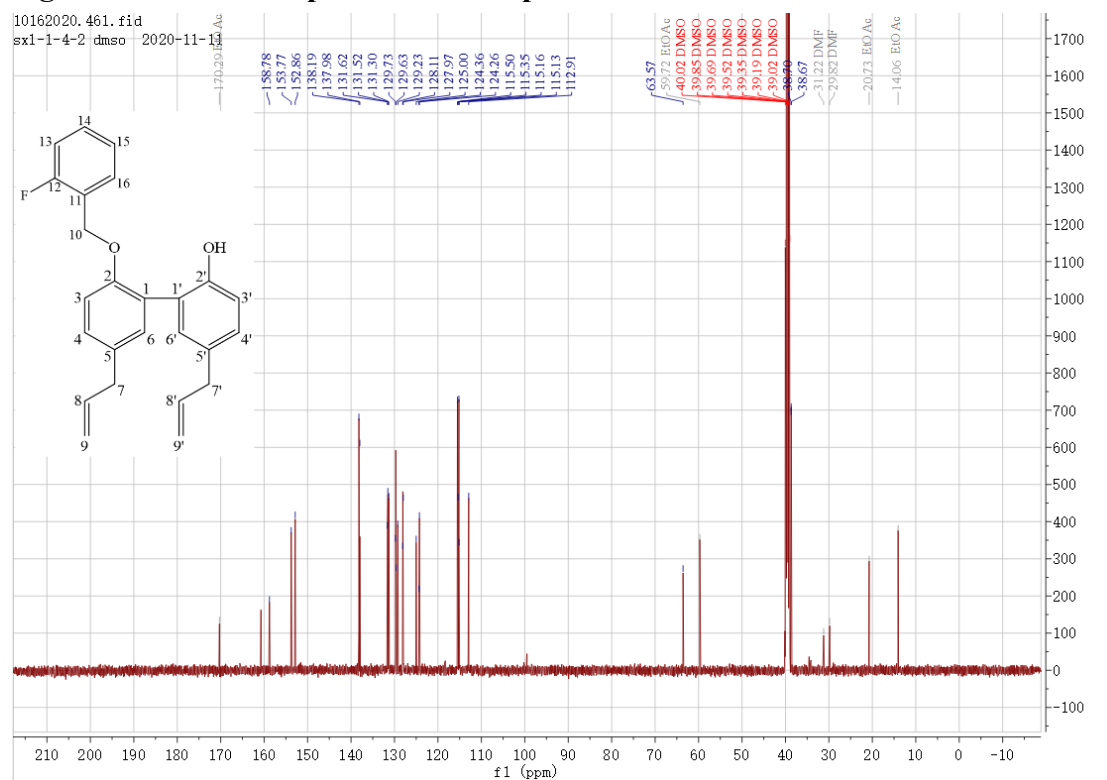

**Figure S14 <sup>13</sup>C NMR spectrum of 4a**

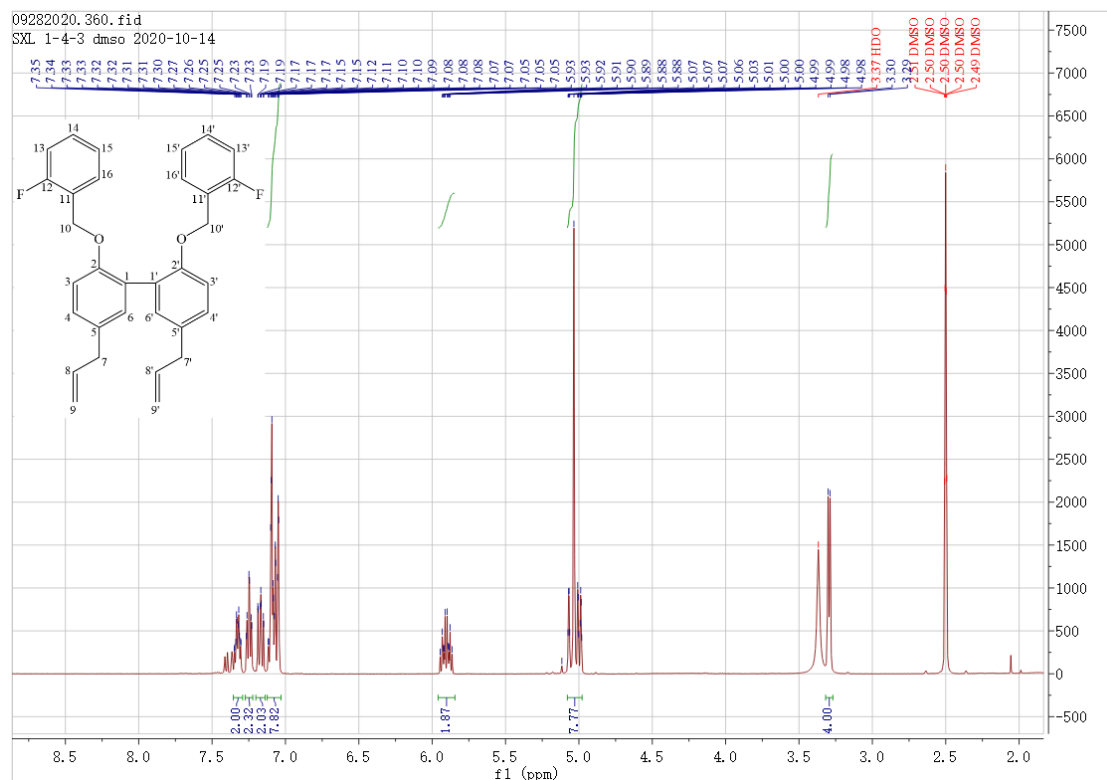

**Figure S15 <sup>1</sup>H NMR spectrum of compound 4b**

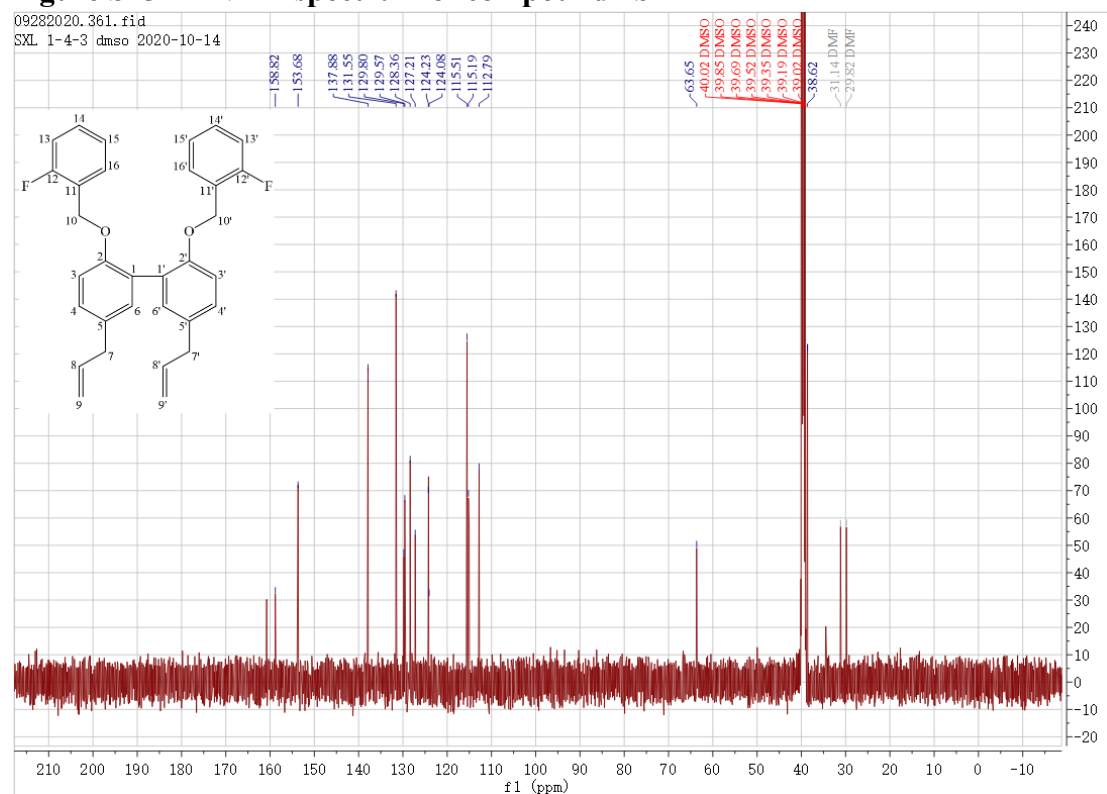

**Figure S16 <sup>13</sup>C NMR spectrum of 4b**

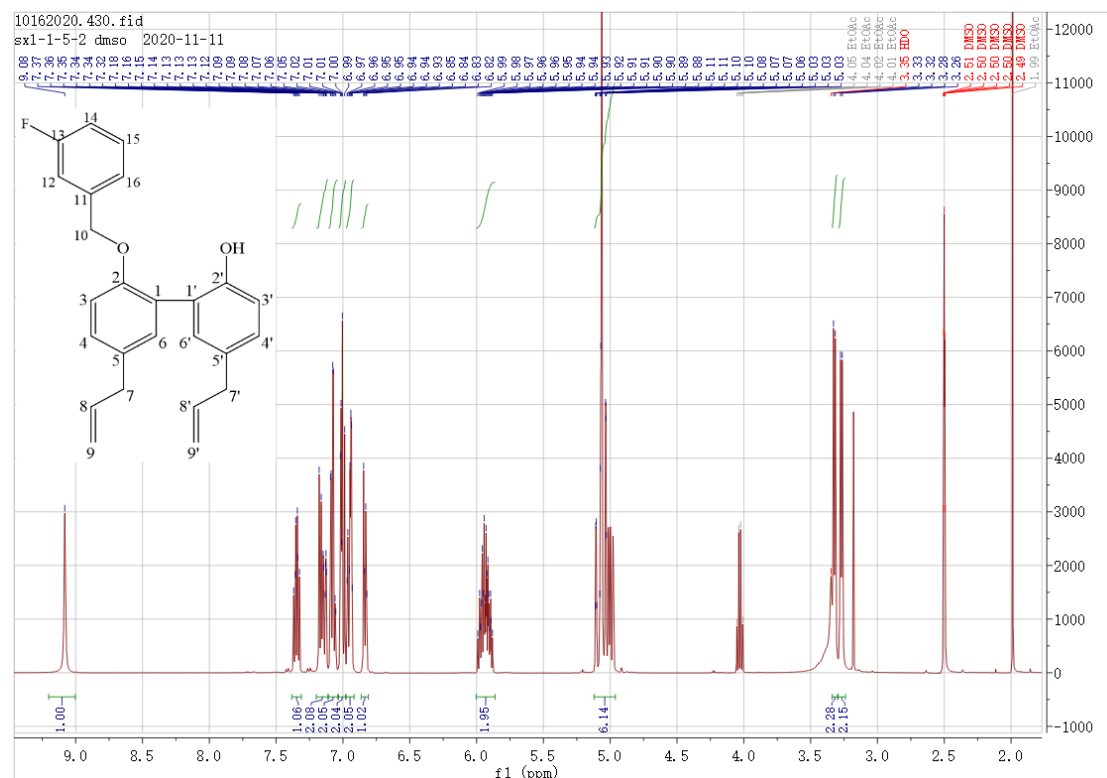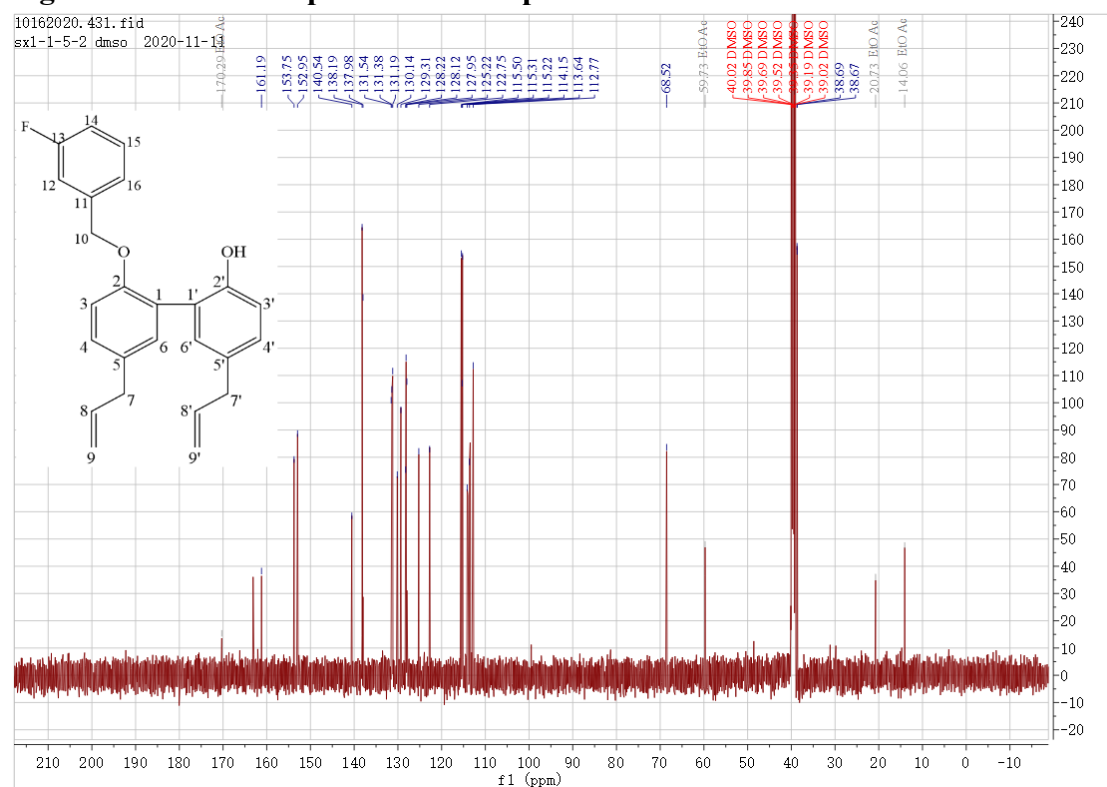

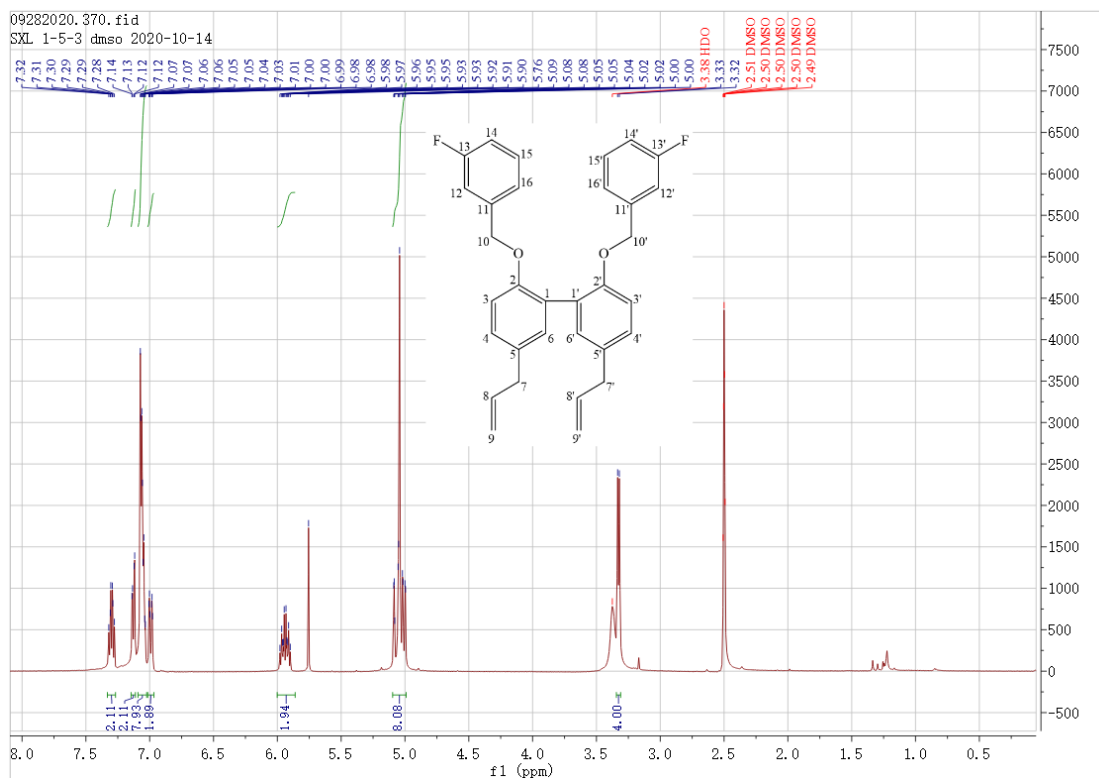

**Figure S19  $^1\text{H}$  NMR spectrum of compound 5b**

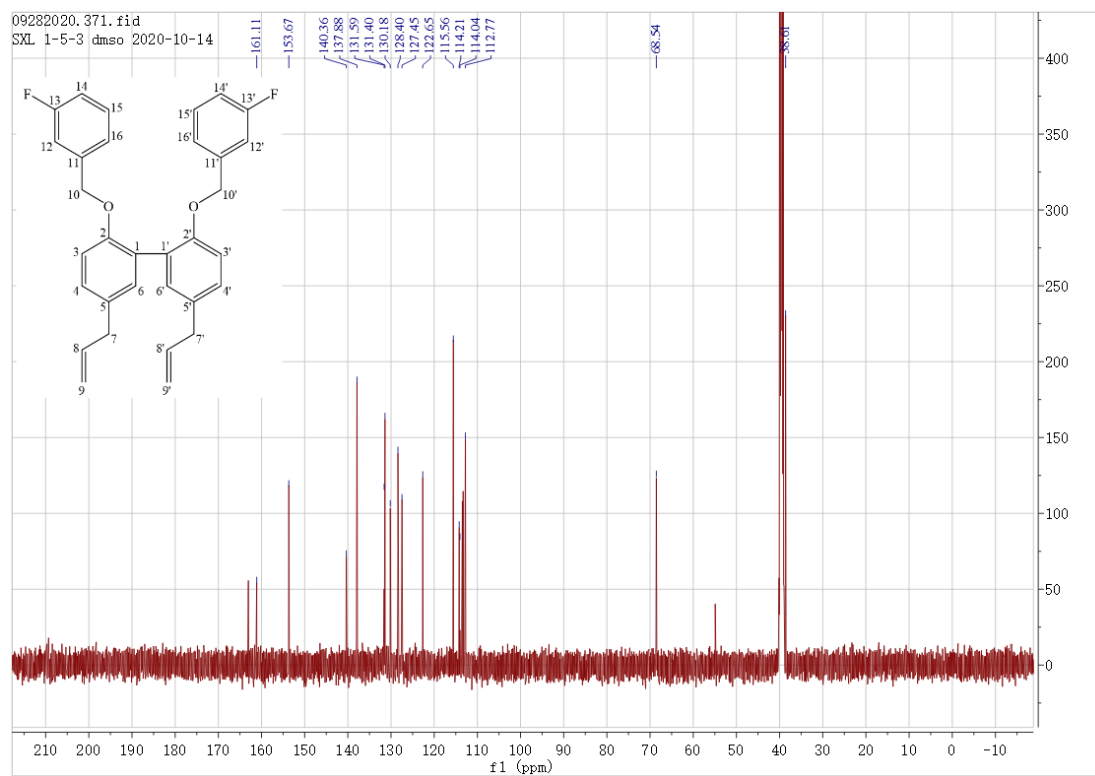

**Figure S20  $^{13}\text{C}$  NMR spectrum of 5b**

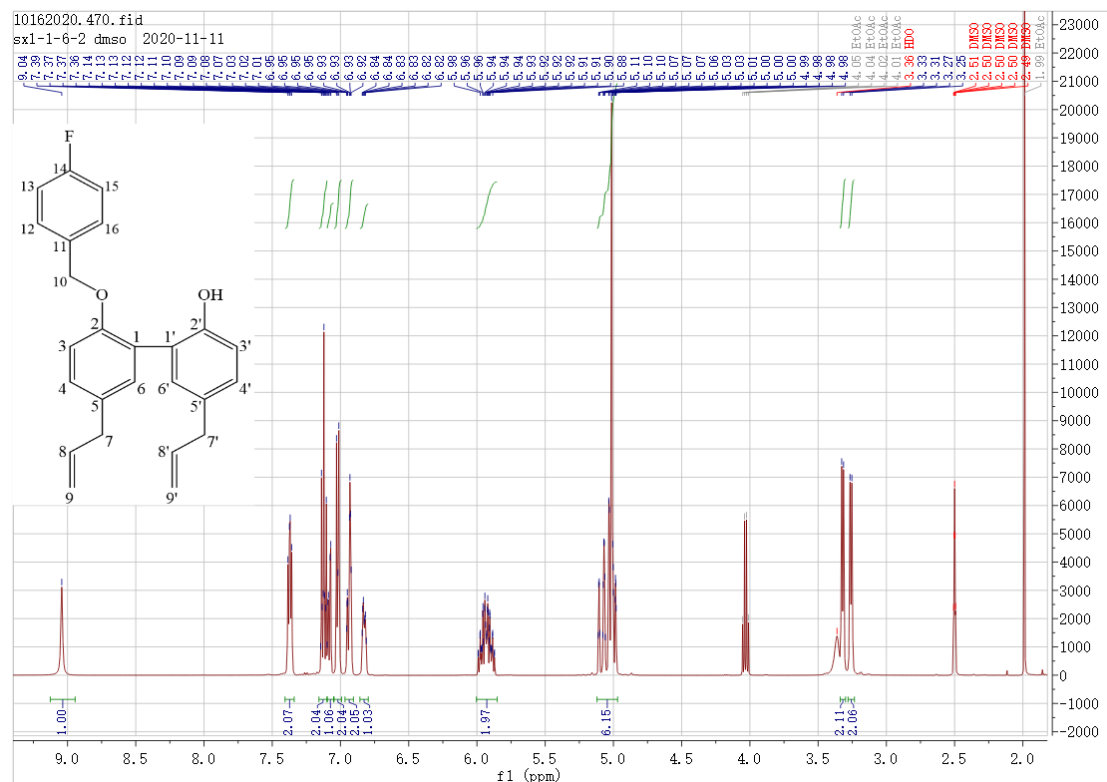

**Figure S21 <sup>1</sup>H NMR spectrum of compound 6a**

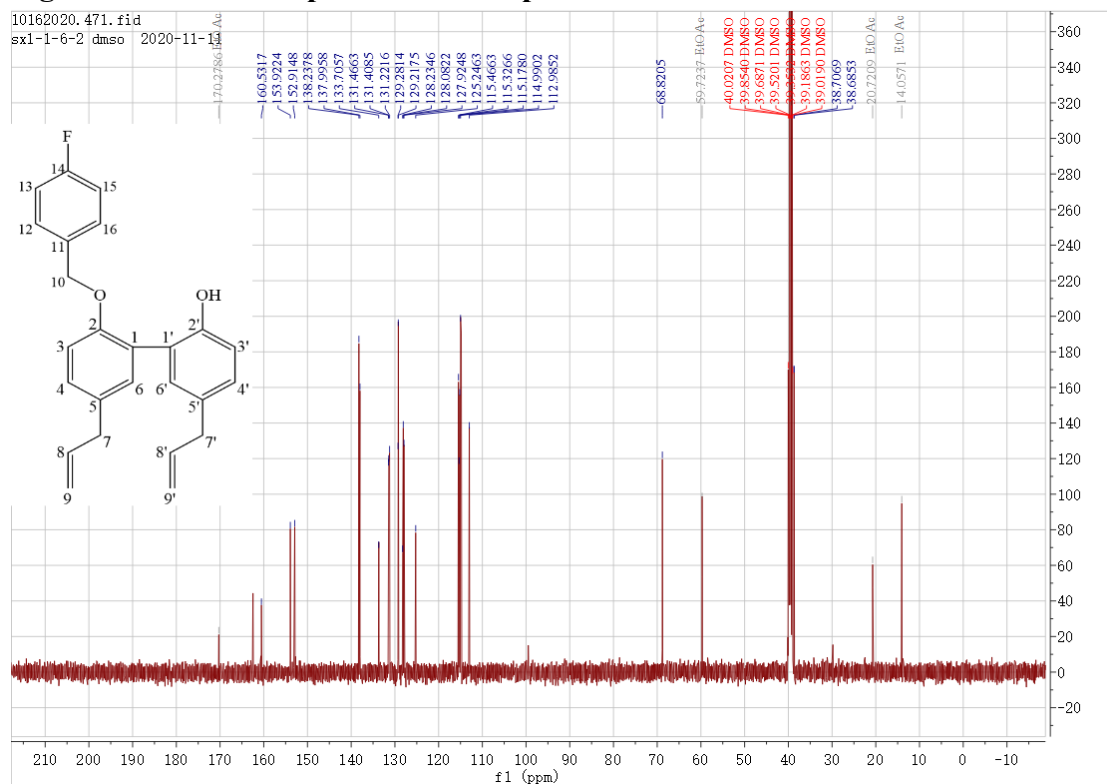

**Figure S22 <sup>13</sup>C NMR spectrum of 6a**

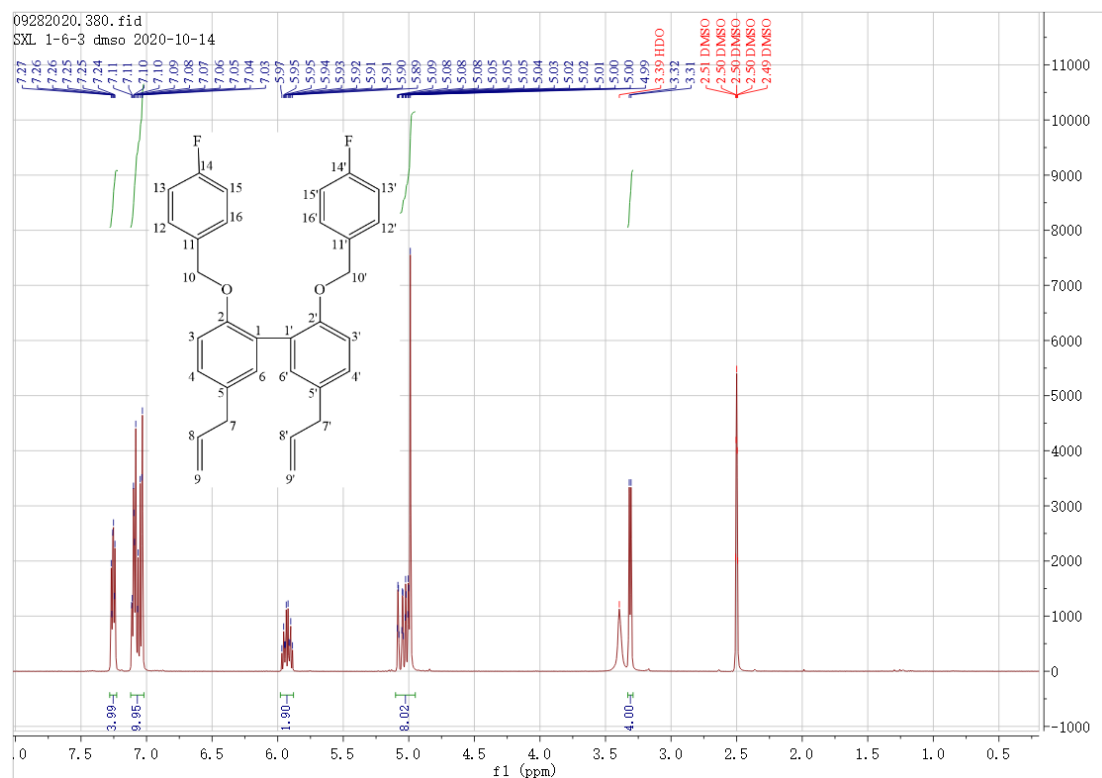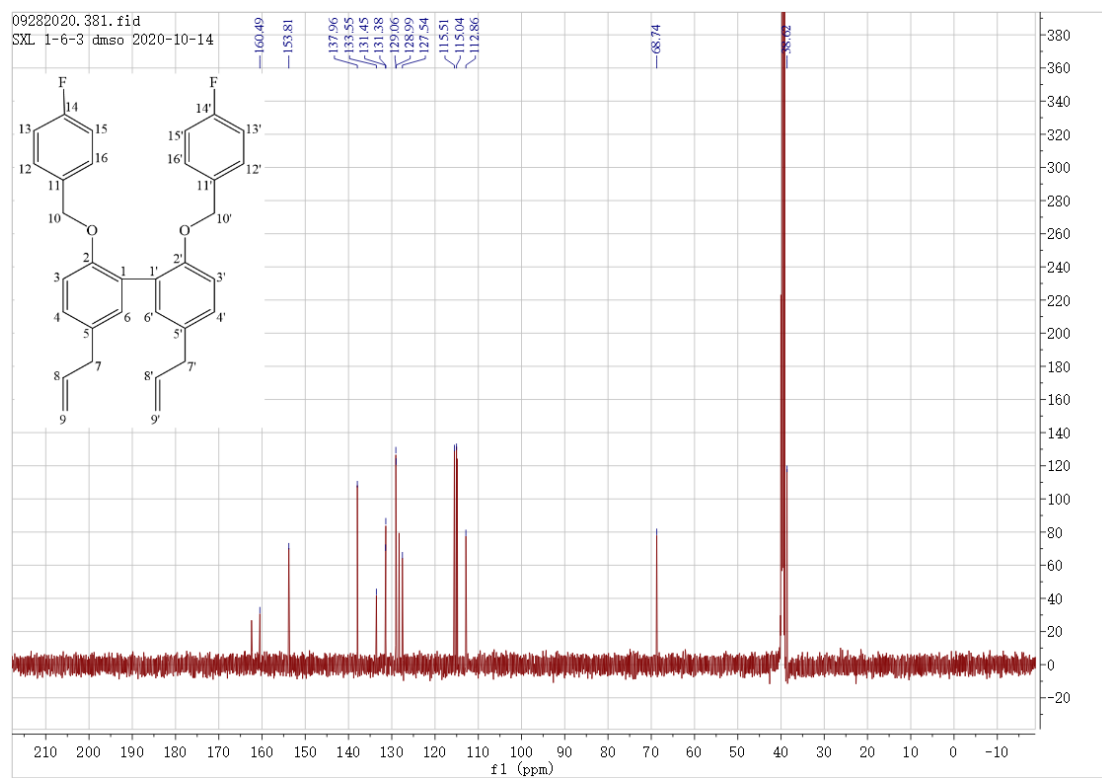

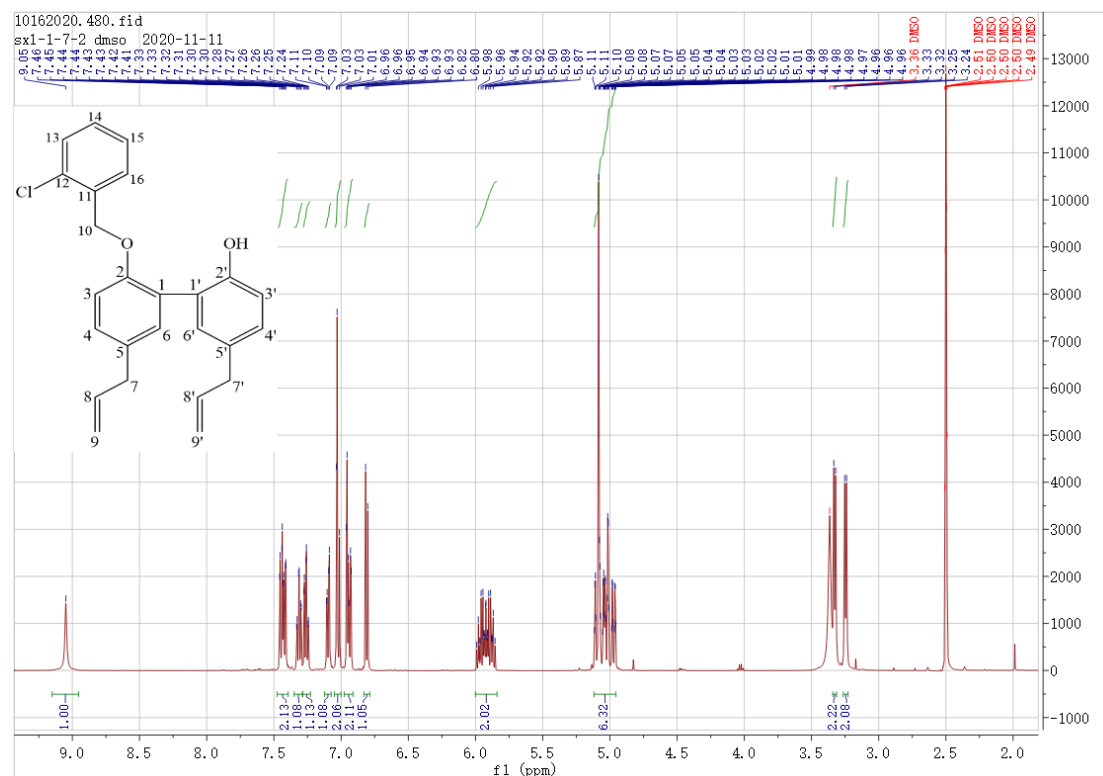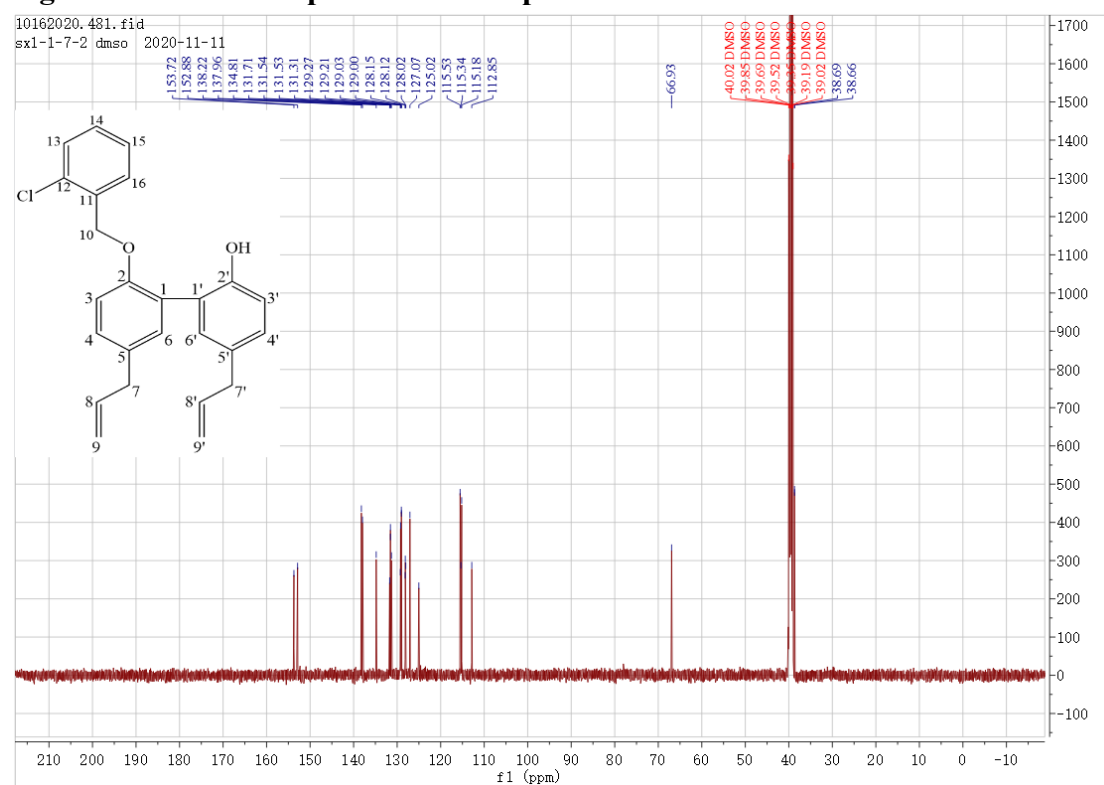

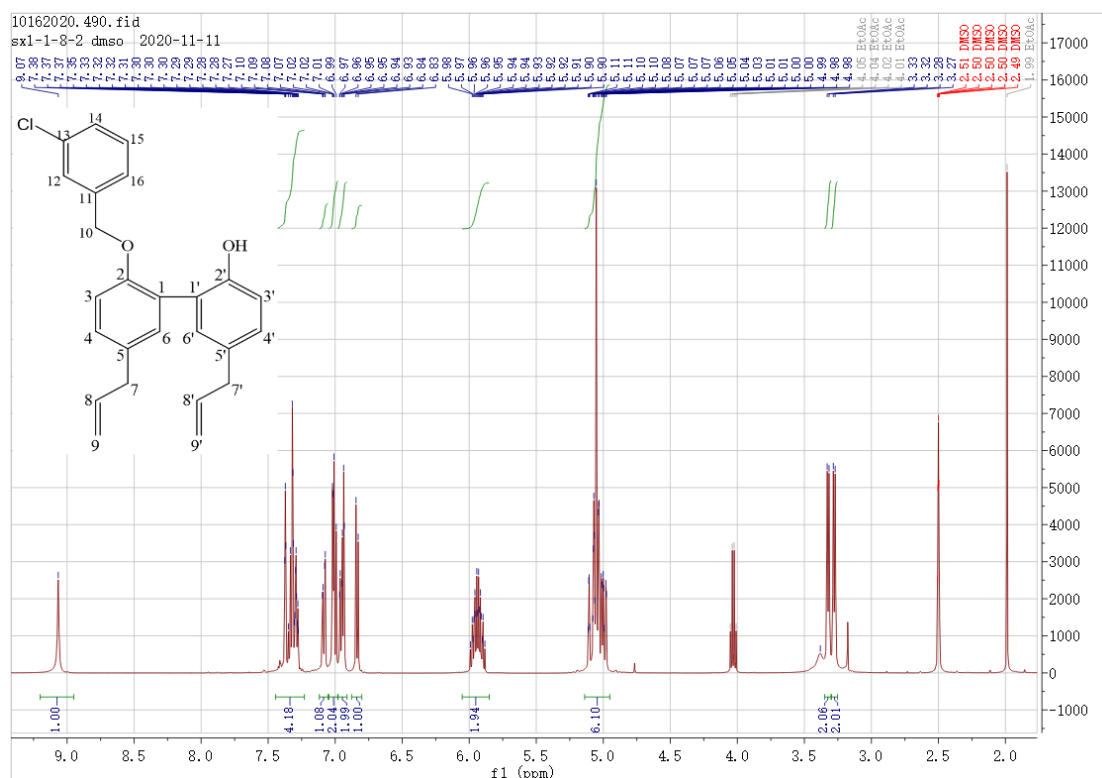

**Figure S27 <sup>1</sup>H NMR spectrum of compound 8a**

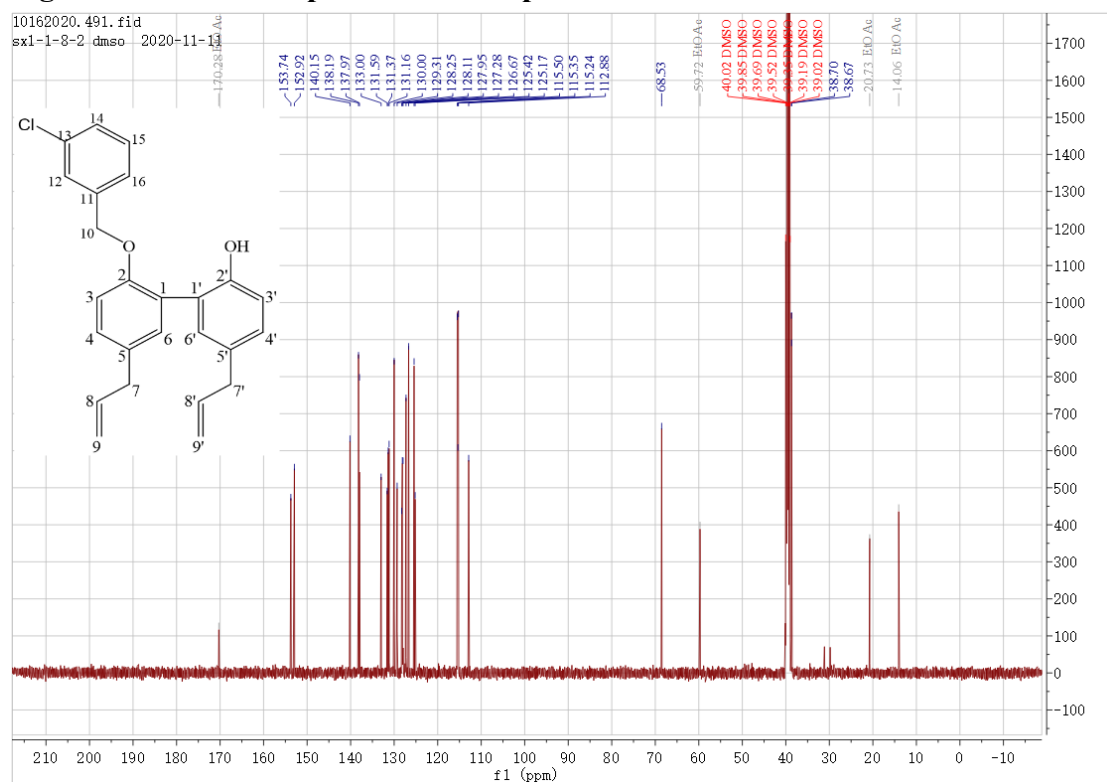

**Figure S28 <sup>13</sup>C NMR spectrum of 8a**



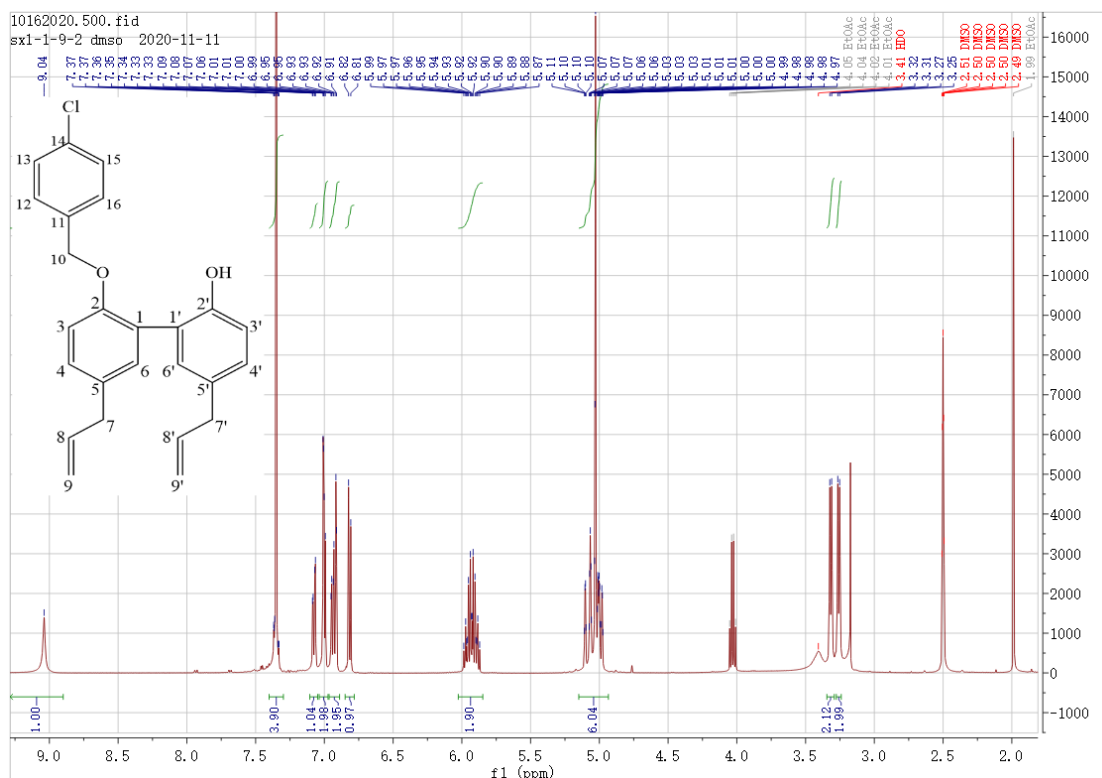

Figure S29 <sup>1</sup>H NMR spectrum of compound 9a

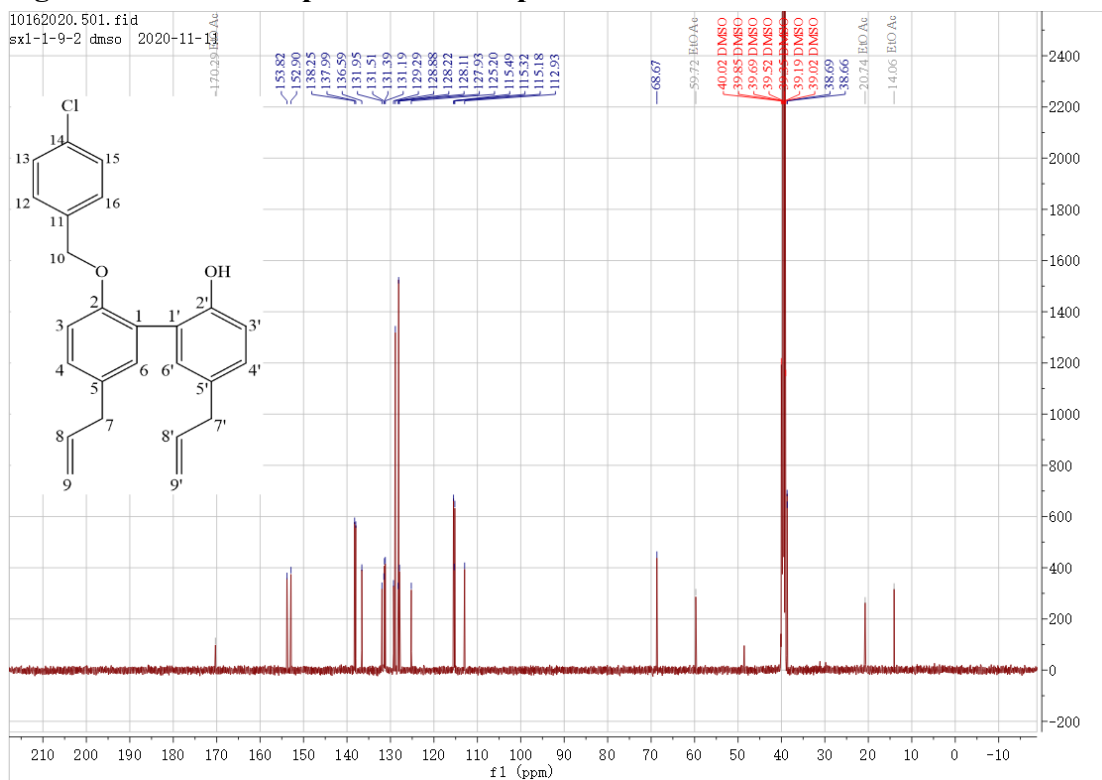

Figure S30 <sup>13</sup>C NMR spectrum of 9a

1-49 #9 RT: 0.10 AV: 1 NL: 1.06E9  
T: FTMS + p ESI Full lock ms [80.0000-1200.0000]

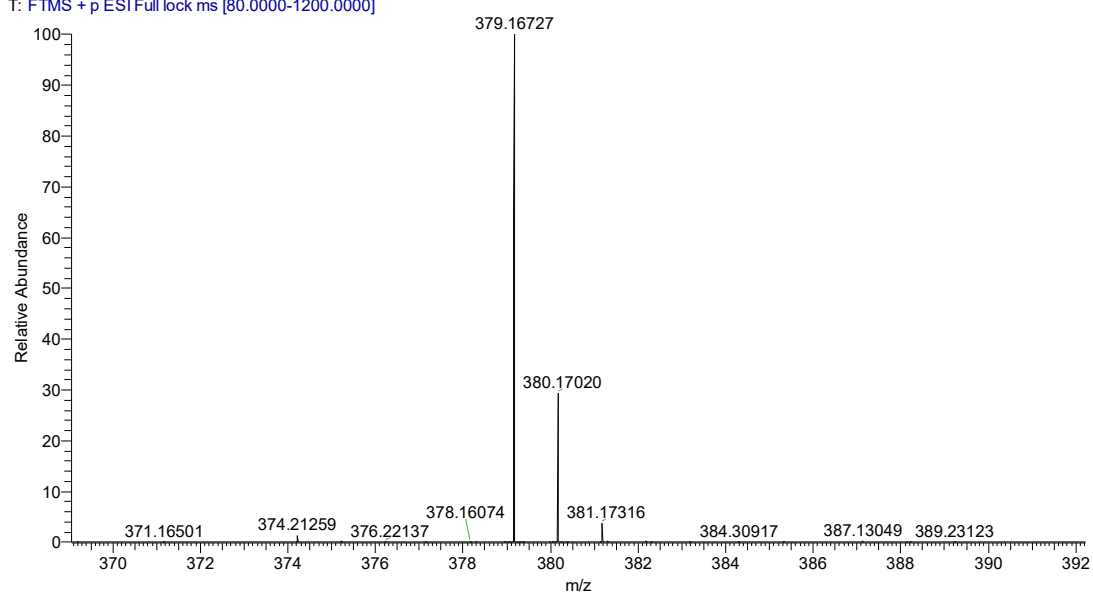

**Figure S31** HR-ESI-MS spectrum of compound 3a

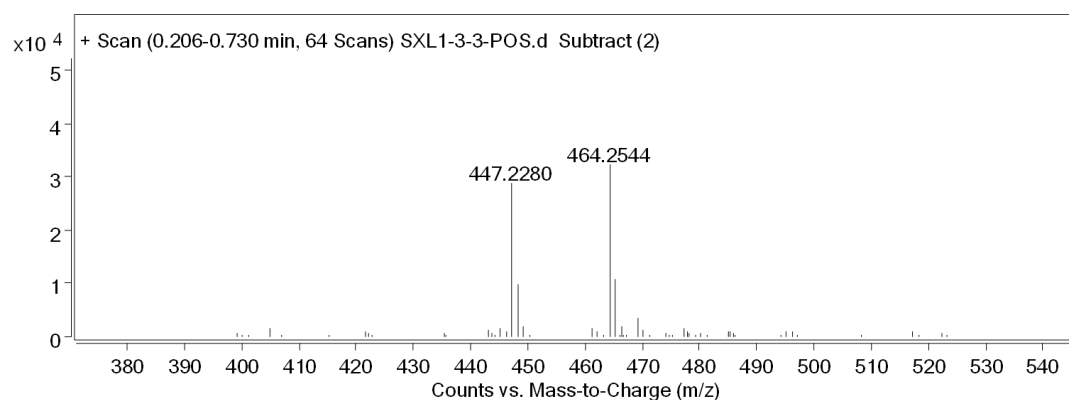

**Figure S32** HR-ESI-MS spectrum of compound 3b

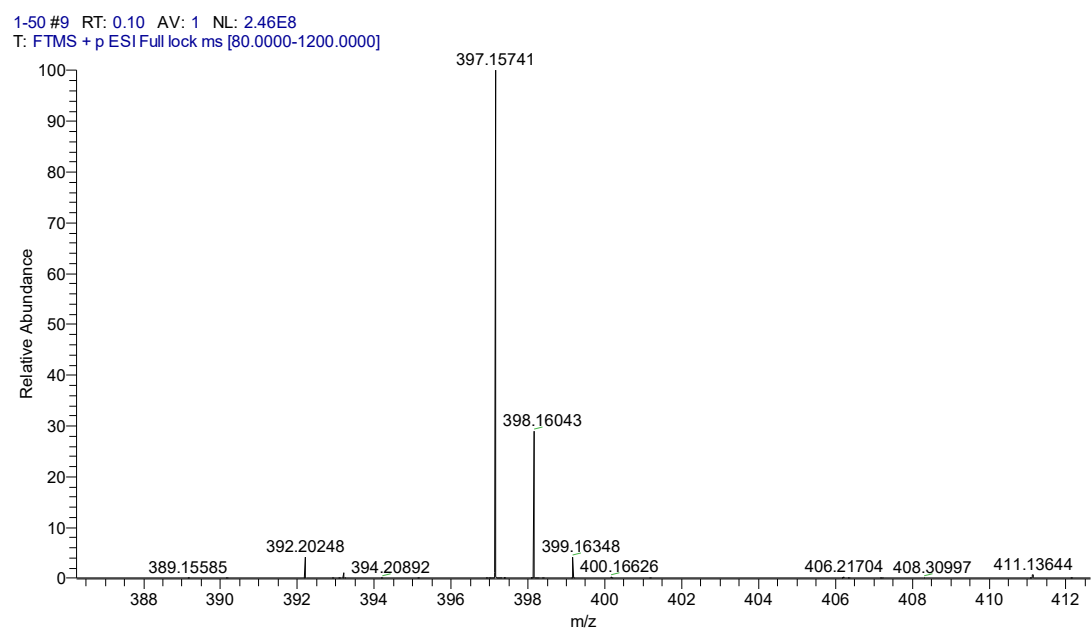

**Figure S33** HR-ESI-MS spectrum of compound 4a

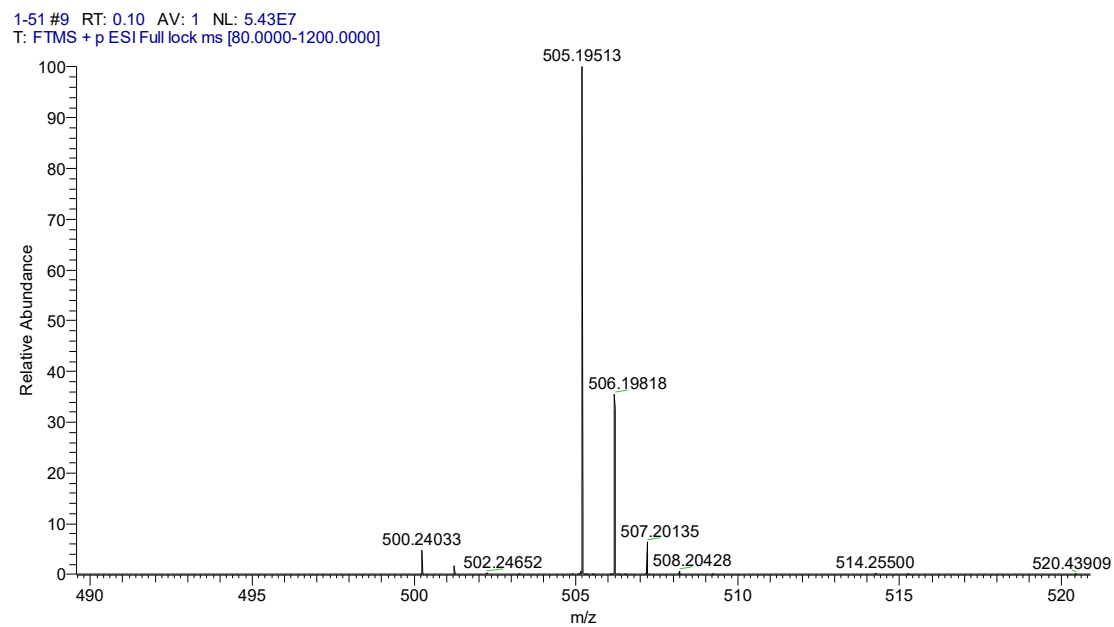

**Figure S34** HR-ESI-MS spectrum of compound 4b

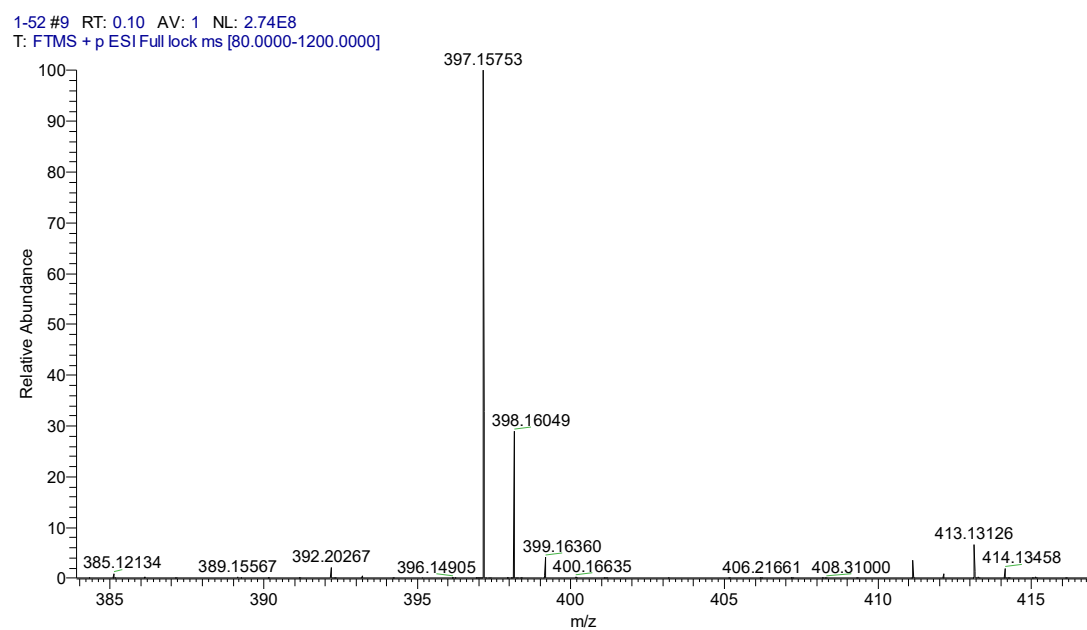

**Figure S35** HR-ESI-MS spectrum of compound 5a

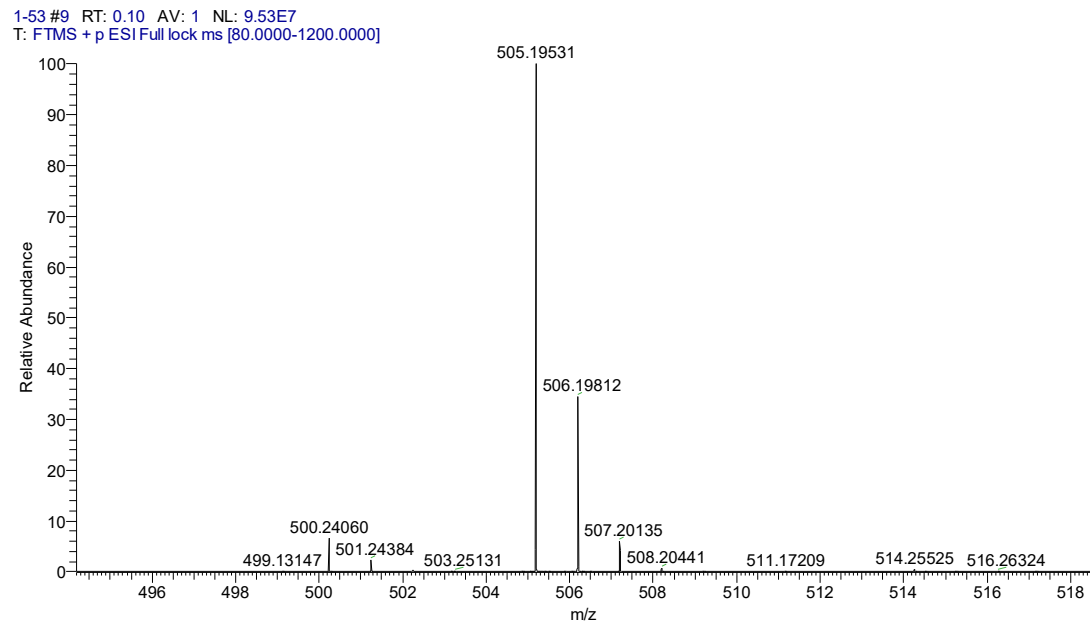

**Figure S36** HR-ESI-MS spectrum of compound 5b

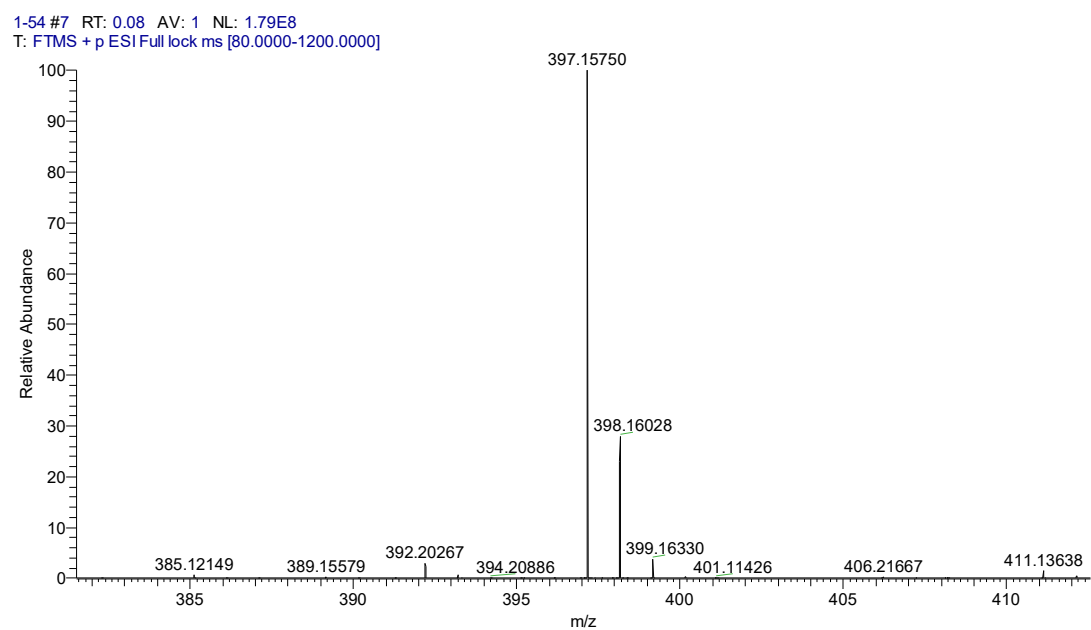

**Figure S37** HR-ESI-MS spectrum of compound 6a

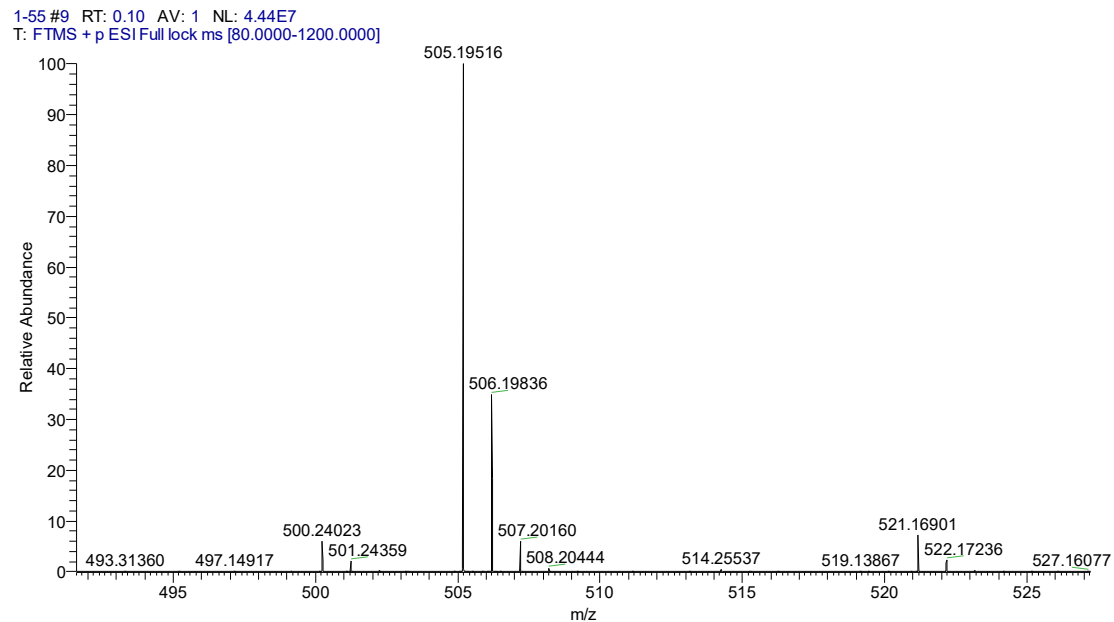

**Figure S38** HR-ESI-MS spectrum of compound 6b

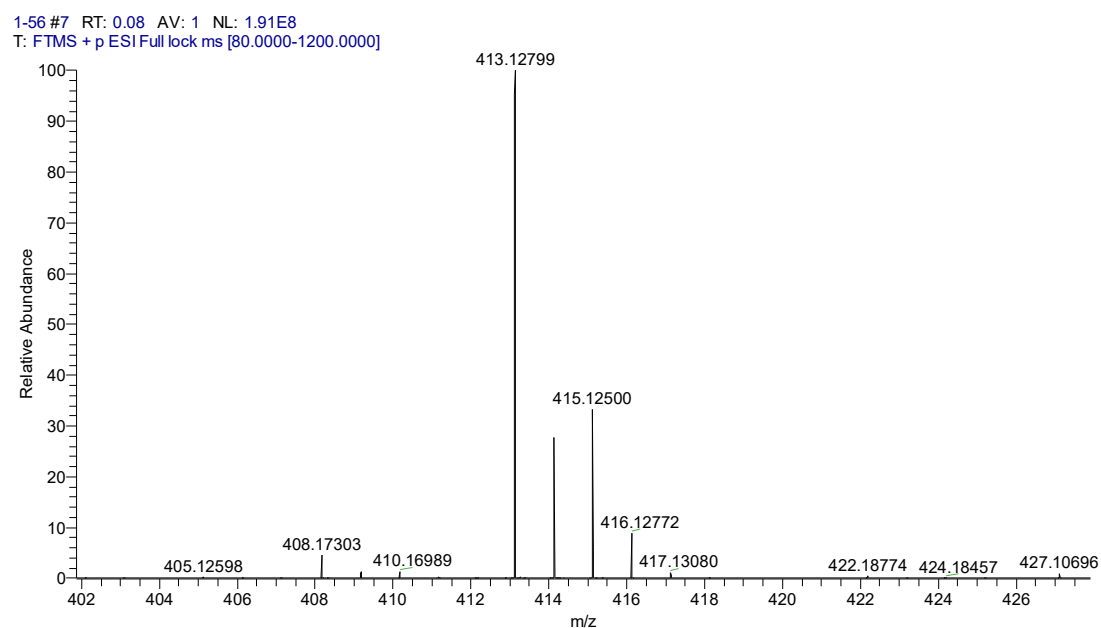

**Figure S39 HR-ESI-MS spectrum of compound 7a**

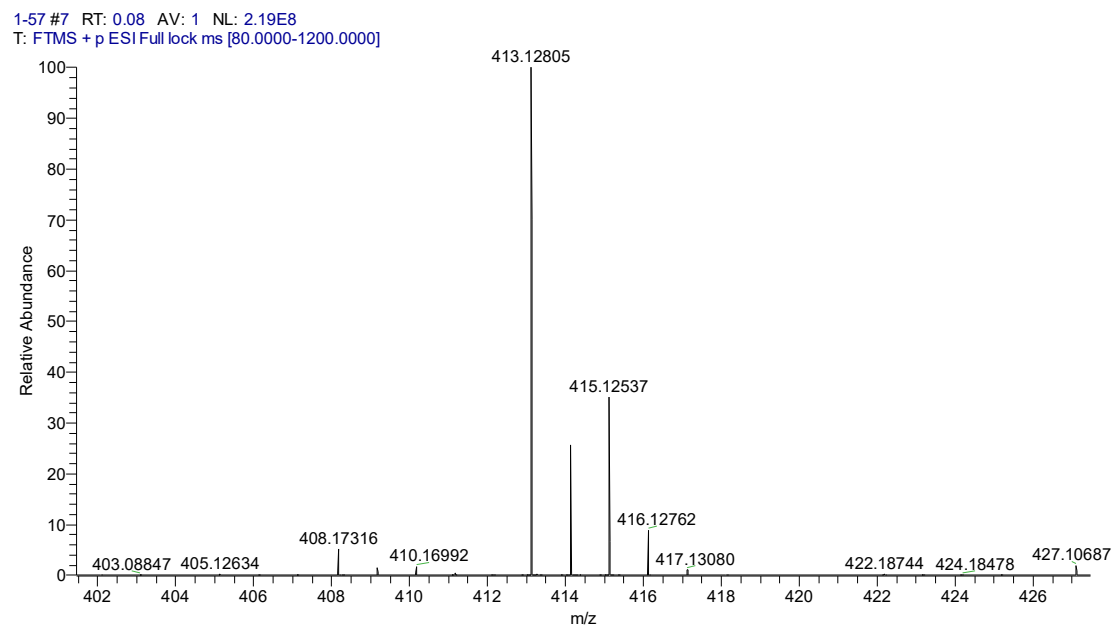

**Figure S40 HR-ESI-MS spectrum of compound 8a**

1-58 #7 RT: 0.08 AV: 1 NL: 1.93E8  
T: FTMS + p ESI Full lock ms [80.0000-1200.0000]

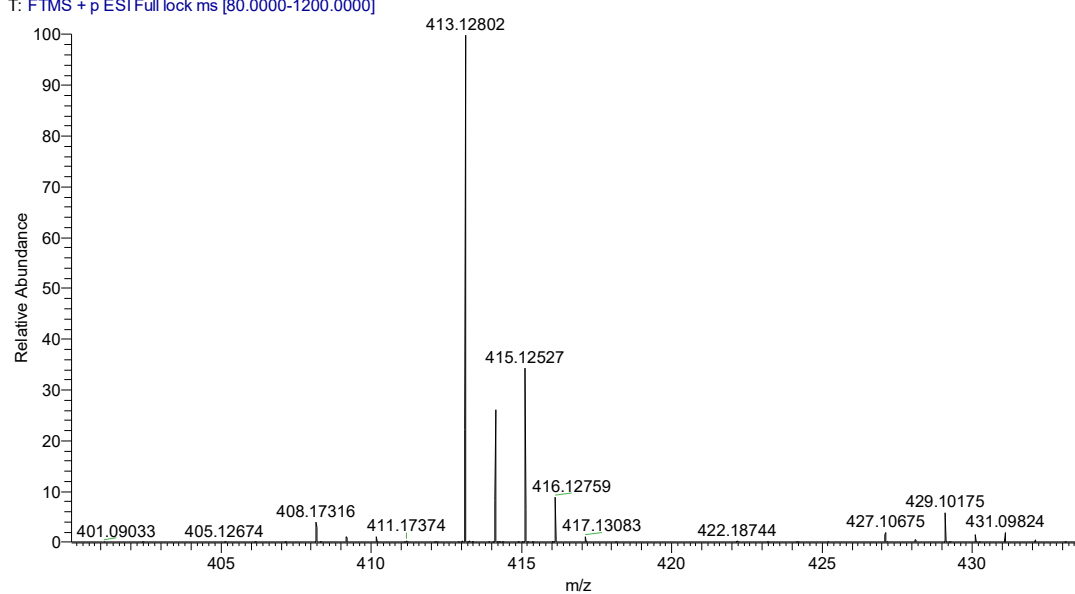

**Figure S41** HR-ESI-MS spectrum of compound 9a
